# Supplementary material for: Prediction of the standard potentials for one-electron oxidation ofN,N,N′,N′ tetrasubstitutedp-phenylenediamines by calculation
Source: Royal Society of Chemistry journal article supplement (doi:10.1039/d1cp02315b), 2021-01-01
Supplement: d1cp02315b1.pdf [file d1cp02315b1.pdf]

## Supplementary information for

### Prediction of the standard potentials for one-electron oxidation of *N,N,N',N'* tetrasubstituted *p*-phenylenediamines by calculation

Cecilie L. Andersen,<sup>a</sup> Evanildo G. Lacerda Jr,<sup>b</sup> Jørn B. Christensen,<sup>c</sup> Stephan P. A. Sauer,<sup>\*a</sup> and Ole Hammerich<sup>\*a</sup>

#### Contents

|                                         |       |      |
|-----------------------------------------|-------|------|
| 1. Chemicals                            | ----- | p. 1 |
| 2. Electrochemistry - CV and DPV curves | ----- | p. 6 |
| 3. Computational output                 | ----- | p. 7 |

#### 1. Chemicals

NMR spectra were recorded on a Bruker 500 MHz apparatus equipped with a cryoprobe and carried out under an N<sub>2</sub>-atmosphere to avoid air-oxidation of the substrates.

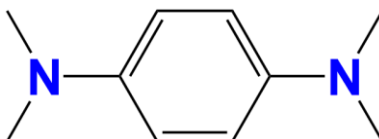

**Figure S1. TMePD:** Commercially available (Aldrich).

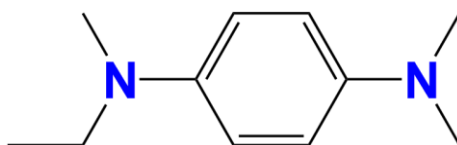

**Figure S2. TrMeEtPD:** A mixture of 10.0 g (60 mmol) *N*-ethyl-4-nitroaniline, 30 mL 30% HCHO in water and 200 mL EtOH was added to 700 mg 10% Pd on C and the mixture was hydrogenated on a Parr-shaker at 3.5 atm H<sub>2</sub> overnight. The catalyst was removed by filtration, the solvent removed in vacuum and the residual liquid distilled in vacuum. Bp. 90 °C/2 mmHg. Yield: 5.2 g (49%). Pale yellow liquid. <sup>1</sup>H NMR (500 MHz in CS<sub>2</sub> with DMSO-d<sub>6</sub> as lock signal) δ ppm: 0.80 (broad singlet, 3H); 2.52 (broad singlet overlapping with the DMSO signal, 9 H); 2.95 (broad singlet, 2 H); 6.28 (s, 4 H). <sup>13</sup>C NMR (125 MHz in CS<sub>2</sub> with DMSO-d<sub>6</sub> as lock signal) δ ppm: 11.11; 37.59; 41.04; 114.53; 141.25; 141.44. GC-MS: 178 (M<sup>+</sup>).

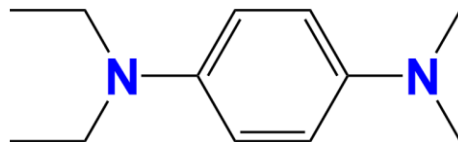

**Figure S3. DMeDEtPD:** A mixture of 12.0 g (73 mmol) of *N,N*-diethyl-*p*-phenylenediamine, 25 mL 30% HCHO in water and 150 mL EtOH was added to 800 mg 10% Pd on C and the mixture was hydrogenated on a Parr-shaker at 3.5 atm H<sub>2</sub> overnight. The catalyst was removed by filtration, the solvent removed in vacuum and the residual liquid distilled in vacuum. Bp. 100 °C/0.1 mmHg. Yield: 70%. Colorless liquid. <sup>1</sup>H NMR (500 MHz in CS<sub>2</sub> with CDCl<sub>3</sub> as lock signal) δ ppm: 1.39 (t of doublets, 6H); 3.10 (d, 6H); 3.48 (quartet of doublets, 4 H); 6.85 (d, 4 H). <sup>13</sup>C NMR (125 MHz in CS<sub>2</sub> with CDCl<sub>3</sub> as lock signal) δ ppm: 13.64; 42.17; 46.25; 42.17; 46.26; 115.66; 116.63; 140.92; 143.62. GC-MS: 192.3 (M<sup>+</sup>).

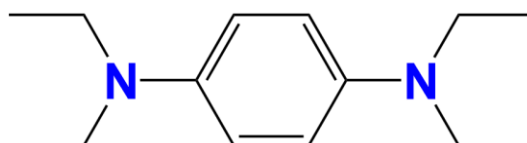

**Figure S4. TtEtPD:** Prepared as described by G. Grampp, A.-M. Kelterer, S. Landgraf, M. Sacher, D. Niethammer, J.P. Telo, R.M.B. Dias, A.J.S.C. Vieira, *Monatshefte für Chemie* **2005**,136, 519–536.

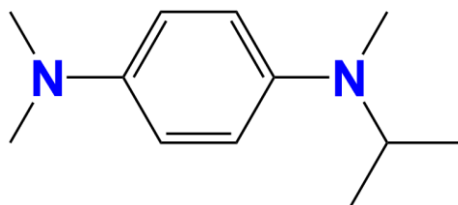

**Figure S5. TrMeiPrPD:** A mixture of 7.7 g *N*-isopropyl-4-nitroaniline (40 mmol), 50 mL 30 % HCHO in water, 150 mL EtOH was added to 700 mg 10 % Pd on C and the mixture was hydrogenated on a Parr-shaker for 48 hours. After removal of the catalyst by filtration, the solvent was removed in vacuum and the crude product purified by column chromatography on aluminum oxide 90 with heptane as eluent. Yield 2.4 g (31 %). Pale yellow oil. <sup>1</sup>H NMR (500 MHz in CS<sub>2</sub> with CDCl<sub>3</sub> as lock signal) δ ppm: 1.36 (d, 6H); 2.89 (s, 3 H); 3.04 (s, 6 H); 6.82 (d, 2 H); 6.90 (d, 2H). <sup>13</sup>C NMR (125 MHz in CS<sub>2</sub> with CDCl<sub>3</sub> as lock signal) δ ppm: 19.63; 31.46; 41.96; 51.53; 115.21; 117.54; 143.12; 143.97. GC-MS: 190 (M<sup>+</sup>).

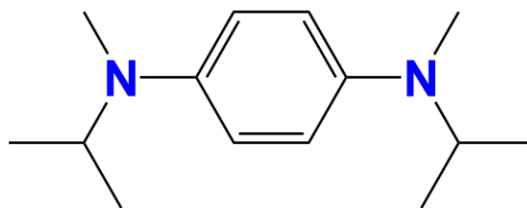

**Figure S6. DMeDiPrPD:** A mixture of 8.1 g (40 mmol) *N,N'*-diisopropyl-*p*-phenylenediamine, 40 mL 30% HCHO in water, 40 mL glacial acetic acid and 100 mL MeOH was added to 800 mg 10% Pd on carbon and hydrogenated on a Parr-shaker at 3.5 atm H<sub>2</sub> overnight. The catalyst was removed by filtration; the filtrate was made alkaline with NaOH (aq) and extracted with diethyl ether. The organic phase was dried over Na<sub>2</sub>SO<sub>4</sub>, filtered and concentrated in vacuum. The residual yellow oil was purified by column chromatography on aluminum oxide S using heptane as eluent to give 3.97 g (45%) of product. Pale yellow oil. <sup>1</sup>H NMR (500 MHz in CS<sub>2</sub> with CDCl<sub>3</sub> as lock signal) δ ppm: 1.36 (broad singlet, 12 H); 2.87 (broad singlet, 6 H); 4.05 (m, 2 H); 6.89 (s, 4 H). <sup>13</sup>C NMR (125 MHz in CS<sub>2</sub> with CDCl<sub>3</sub> as lock signal): δ ppm 19.66; 31.36; 51.05; 117.04; 143.36. GC-MS: 192 (M<sup>+</sup>).

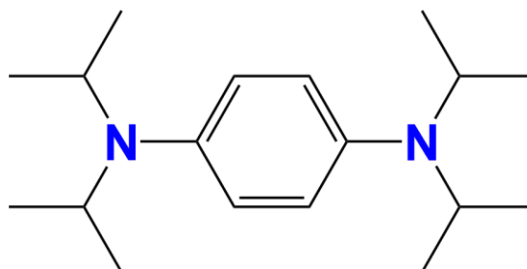

**Figure S7. TiPrPD:** A mixture of 33.5 g (170 mmol) *N,N'*-diisopropyl-*p*-phenylenediamine, 50 g K<sub>2</sub>CO<sub>3</sub>, 122 g (990 mmol) 2-bromopropane and 250 mL 2-propanol was refluxed for 2 weeks and concentrated in vacuum. The residue was dissolved in a mixture of water and diethyl ether. The organic phase was separated, dried over Na<sub>2</sub>SO<sub>4</sub>, filtered and concentrated in vacuum to give 33.5 g of a dark yellow oil. This material was purified in 5 g batches by column chromatography on aluminum oxide 90 with heptane as eluent. Yield: 27.3 g (58 %). Pale yellow oil, that solidifies upon standing in the refrigerator. <sup>1</sup>H NMR (500 MHz in CS<sub>2</sub> with CDCl<sub>3</sub> as lock signal) δ ppm: 1.38 (d, 24 H); 3.89 (septet, 4 H); 7.01 (s, 4 H). <sup>13</sup>C NMR (125 MHz in CS<sub>2</sub> with CDCl<sub>3</sub> as lock signal): δ ppm: 22.34; 48.36; 124.35; 141.57;. GC-MS: 276 (M<sup>+</sup>).

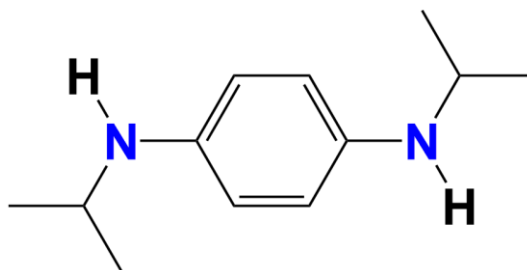

**Figure S8. DHDiPrPD:** Prepared as described by R.T. Major, *J. Am. Chem. Soc.*, **1931**, *53*, 4373-4378.

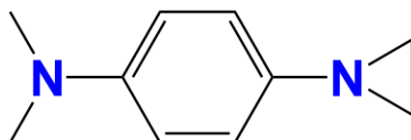

**Figure S9. DMeAzirA:** Prepared as described by K. Crimaldi, R.L. Lichter, A.D. Baker, *J. Org. Chem.*, **1982**, 47, 3524-3528.

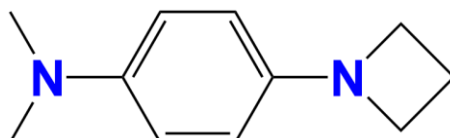

**Figure S10. DMeAzetA:** A mixture of 5.0 g (23.9 mmol) *N,N*-dimethyl-*p*-phenylenediamine dihydrochloride, 14 g  $K_2CO_3$ , 3.7 g (23.5 mmol) 1-bromo-3-chloropropane and 100 mL 2-propanol was refluxed for 5 days and concentrated in vacuum. The residue was dissolved in a mixture of water and diethyl ether. The organic phase was separated, dried over  $Na_2SO_4$ , filtered and concentrated in vacuum to give a dark oil. This material was purified by column chromatography on aluminum oxide 90 with heptane/toluene (1:1) as eluent. Yield: 70 mg (2 %).  $^1H$  NMR (500 MHz in  $CS_2$  in  $CDCl_3$  as lock signal)  $\delta$  ppm: 2.54 (s, 2 H); 3.04 (s, 6 H); 3.96 (s, 4 H); 6.47 (s, 1 H); 6.80 (s, 1 H).  $^{13}C$  NMR (125 MHz in  $CS_2$  with  $CDCl_3$  as lock signal):  $\delta$  ppm: 12.97; 36.83; 48.09; 107.3; 109.98. GC-MS: 176 ( $M^+$ ).

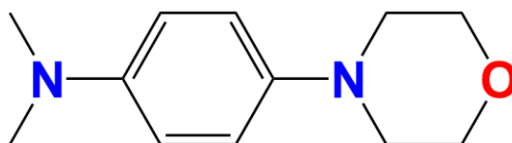

**Figure S11. DMeMorphA:** Prepared as described by J.B. Christensen, N.-C. Schiødt, K. Bechgaard, T. Buch-Rasmussen, *Acta Chem. Scand.*, **1996**, 50, 1013-1019.

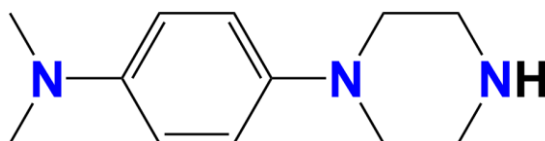

**Figure S12. DMePiprZA:** Prepared as described in US Patent 5,432,177 (1995).

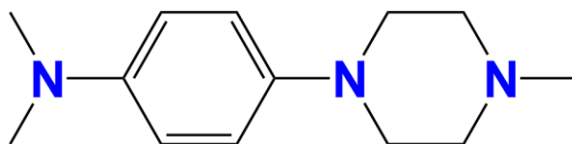

**Figure S13. DMeMePiprZA:** 750 mg (20 mmol) Lithium aluminum hydride was added to a stirred solution of 3.89 g (12.7 mmol) *tert*-butyl 4-(4-(dimethylamino)phenyl)piperazine-1-carboxylate (also described in US Patent 5,432,177 (1995)) in 100 mL THF. The reaction mixture was refluxed overnight, cooled to room temperature and hydrolyzed by addition of 25% NaOH in water until the gas evolution ceased. The mixture was filtered through a bed of anhydrous Na<sub>2</sub>SO<sub>4</sub>, concentrated and dried in vacuum. Yield: 2.88 g (74 %). An analytical sample was crystallized from 96 % EtOH. Mp. 80-82 °C. <sup>1</sup>H NMR (500 MHz in CS<sub>2</sub> with CDCl<sub>3</sub> as lock signal) δ ppm: 2.54 (s, 3 H); 2.79 (m, 4 H); 3.14 (m, 6 H); 3.99 (m, 2 H); 6.84 (m, 2 H); 6.98 (m, 2 H). <sup>13</sup>C NMR (125 MHz in CS<sub>2</sub> with CDCl<sub>3</sub> as lock signal) δ ppm: 41.72; 46.77; 51.11 55.86; 114.72; 118.57; 143.69; 145.24. GC-MS: 219.3 (M<sup>+</sup>).

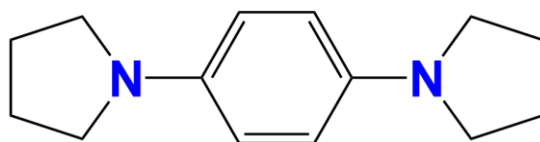

**Figure S14. BPyrB:** Prepared as described by J. B. Christensen, N.-C. Schiødt, K. Bechgaard, T. Buch-Rasmussen, *Acta Chem. Scand.*, **1996**, 50, 1013-1019.

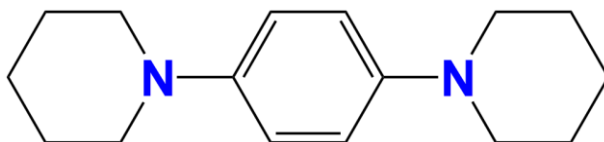

**Figure S15. BPipB:** Prepared as described by J. B. Christensen, N.-C. Schiødt, K. Bechgaard, T. Buch-Rasmussen, *Acta Chem. Scand.*, **1996**, 50, 1013-1019.

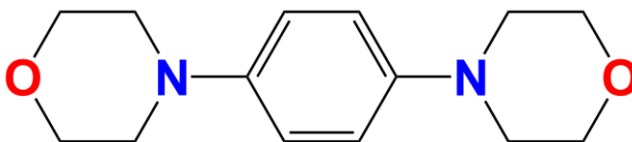

**Figure S16. BMorphB:** Prepared as described by J. B. Christensen, N.-C. Schiødt, K. Bechgaard, T. Buch-Rasmussen, *Acta Chem. Scand.*, **1996**, 50, 1013-1019.

## 2. Electrochemistry – CV and DPV curves

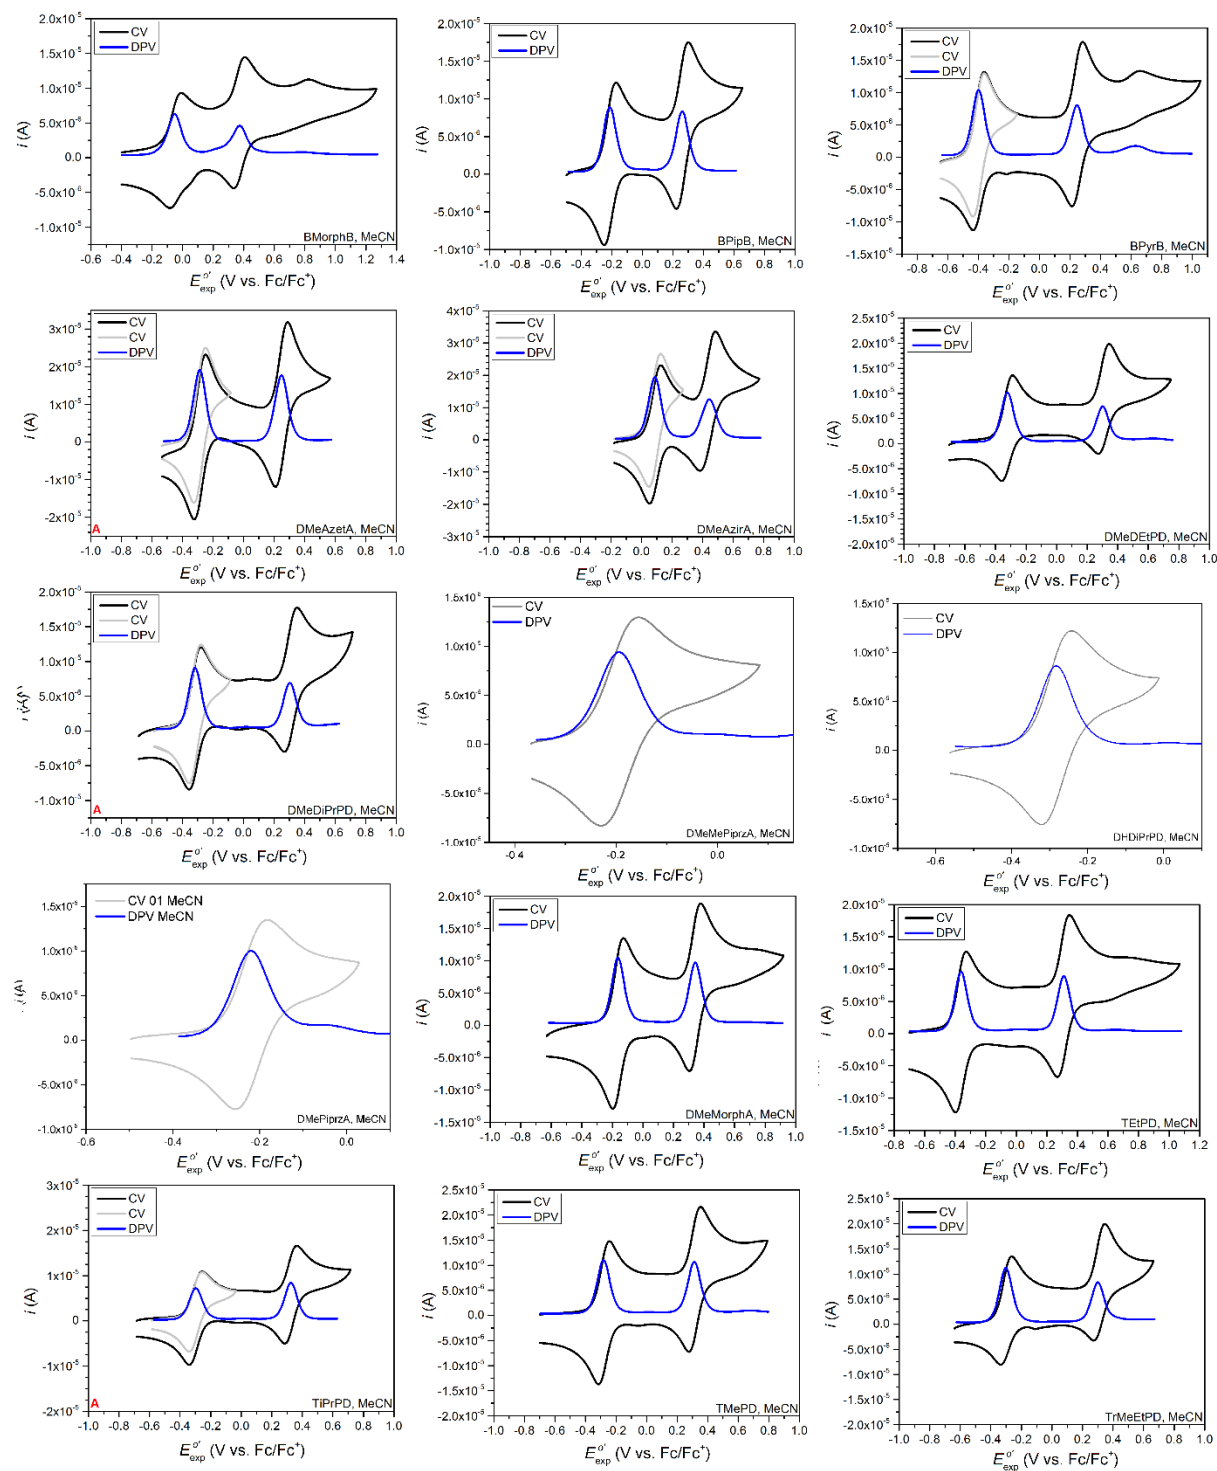

Figure S17. Voltammograms recorded by CV (black and grey) and DPV (blue).

### 3. Computational output

#### a) Neutral substrates in the gas phase – lowest free energy conformers B3LYP/6-31G(d,p)

##### BMorphB

```
1\1\GINC-SLEJPNER\FOpt\RB3LYP\6-31G(d,p)\C14H20N2O2\CECILIE\21-Oct-201
4\0\# opt=tight freq=noraman rb3lyp/6-31g(d,p) geom=connectivity\BMo
rphB conformation 01\0,1\C,0.0796672131,-0.6888726287,-1.1653674807\C
,-0.003416622,0.7074144804,-1.1591171604\C,-0.0349478282,1.4304782055,
0.0393735811\C,0.0095709568,0.6908227514,1.2381636068\C,0.09186775,-0.
6922453267,1.2319726816\C,0.1347387456,-1.4212358174,0.0266079423\N,0.
1803911505,-2.8388992748,0.0669317117\N,-0.1577105169,2.8431346699,0.0
923696516\C,0.8707019223,3.5600152539,0.8591660119\C,-0.4600462977,3.5
404857004,-1.1541614388\C,1.2869727325,-3.4355798802,0.8278344699\C,-0
.0377937165,-3.5560297934,-1.1859289056\C,1.019660594,-4.9210003003,1.
0531297307\C,-0.2625370989,-5.039320572,-0.8948099166\C,0.4292417805,5
.0011834804,1.0975648689\C,-0.8589448013,4.9840024607,-0.8499410257\H,
0.1213304679,-1.1949797394,-2.123029258\H,-0.0225745509,1.2234126881,-
2.1122040597\H,-0.0655250542,1.2093138913,2.1889909732\H,0.079290391,-
1.2244457461,2.1780961844\H,1.0286061285,3.0649639656,1.8199729902\H,1
.8352689112,3.5610093482,0.3201297275\H,0.4007871857,3.5457578598,-1.8
483348566\H,-1.292943022,3.0357564756,-1.6540883598\H,2.2445608788,-3.
3173700979,0.2893156377\H,1.3855743576,-2.9338921921,1.7931049702\H,-0
.924934568,-3.1491860649,-1.681766269\H,0.8172153438,-3.4529947942,-1.
8796747431\H,1.8763272647,-5.3936667686,1.5423942787\H,0.1329452413,-5
.040653459,1.6969992696\H,-0.3470937113,-5.601681816,-1.8292729507\H,-
1.1970073865,-5.1605617503,-0.3232114823\H,1.2240634001,5.567718203,1.
5914958761\H,-0.4650740853,5.0090866699,1.7419911561\H,-1.0100736037,5
.5406856255,-1.7793955017\H,-1.8009050331,4.9884692394,-0.2777958613\O
,0.8269904632,-5.6035138719,-0.1784359534\O,0.1563585377,5.6669995552,
-0.1279663265\Version=EM64L-G09RevB.01\State=1-A\HF=-805.4673057\RMSE
=3.380e-09\RMSF=1.327e-06\Dipole=-0.0896884,-0.0058173,0.1095295\Quadr
upole=0.9121593,-9.7071332,8.7949739,0.6166668,3.8776242,0.1476953\PG=
C01 [X(C14H20N2O2)]\@
```

##### BPipB

```
1\1\GINC-SLEJPNER\FOpt\RB3LYP\6-31G(d,p)\C16H24N2\HAMMERICH\28-Mar-201
9\0\# opt=tight freq=noraman rb3lyp/6-31g(d,p)\BPipB syn syn\0,1\C,
-0.7442582269,1.1312660652,0.545419763\C,0.6525460616,1.1400291764,0.6
305633203\C,1.4180380662,0.0596148906,0.175116847\C,0.720776859,-1.031
7481601,-0.3823062121\C,-0.6618160232,-1.0404218304,-0.4665834719\C,-1
.4352025837,0.0417157999,0.0011955247\N,-2.8468900207,0.0010473054,-0.
1409296325\N,2.8369336035,0.0367008816,0.2055308579\C,3.5216509613,1.3
003239535,0.4671646318\C,3.4452570288,-1.08607969,0.9350381863\C,-3.57
40541193,1.2558139074,0.0346353331\C,-3.5252306295,-1.1298015657,0.510
1529993\C,-4.9933138013,1.1446375964,-0.5356012702\C,-4.9378698133,-1.
3209735922,-0.0474395782\C,5.000939749,1.2073320584,0.0736109967\C,4.9
174384634,-1.2591535579,0.5532890067\H,-1.2873737832,1.986050735,0.932
```

6067117\H,1.1338859367,2.0012411902,1.0801972287\H,1.2814387432,-1.864  
2722324,-0.7965737852\H,-1.1575594389,-1.879574594,-0.9452447123\H,3.0  
329906178,2.0846318,-0.1181833695\H,3.4471065521,1.5942493439,1.533383  
8502\H,3.3661505502,-0.9237571828,2.028003313\H,2.8878929945,-1.997554  
6497,0.7110892667\H,-3.6332411937,1.5498413067,1.1017893916\H,-3.02775  
85255,2.0466119,-0.4876287625\H,-2.9334455451,-2.0340688949,0.35625296  
77\H,-3.5814894382,-0.967332276,1.6045103943\H,-5.525057981,2.08806012  
8,-0.3639055705\H,-4.9229230122,1.0026359542,-1.6210684238\H,-5.426673  
0274,-2.1491545973,0.4793646135\H,-4.8647136831,-1.602808617,-1.105334  
6735\H,5.4960600067,2.1571947616,0.3079058268\H,5.0646863812,1.0652957  
629,-1.012262111\H,5.3489543281,-2.0815649695,1.1361858182\H,4.9768368  
783,-1.5410683181,-0.5054463479\C,5.6965043012,0.0412352788,0.78624835  
59\H,5.7402345619,0.2483145589,1.8650368366\H,6.7325020149,-0.05915498  
88,0.4428616059\C,-5.7556534602,-0.03060038,0.088175932\H,-5.932668799  
7,0.1751010736,1.1535074211\H,-6.7409394233,-0.1436722019,-0.378418389  
4\Version=EM64L-G09RevB.01\State=1-A\HF=-733.6948108\RMSD=8.993e-09\R  
MSF=3.961e-06\Dipole=-0.0188592,-0.0074027,0.3101771\Quadrupole=4.9483  
036,0.5044533,-5.4527569,-0.0304676,0.6303188,0.9611337\PG=C01 [X(C16H  
24N2)]\@

## BPyrB

1\1\GINC-SLEJPNER\FOpt\RB3LYP\6-31G(d,p)\C14H20N2\HAMMERICH\28-Mar-201  
9\0\# opt=tight freq=noraman rb3lyp/6-31g(d,p)\BPyrB conf02\0,1\C,0  
.6863760636,1.2117534459,-0.023780944\C,-0.704415807,1.204170409,-0.07  
45545684\C,-1.4388524198,0.0035927961,-0.0074929094\C,-0.6987653422,-1  
.1891784638,0.1138870081\C,0.6920267727,-1.1815954541,0.1646606405\C,1  
.4264632005,0.0189820168,0.0975987367\H,1.2000347291,2.1645014777,-0.0  
92302824\H,-1.2222650828,2.1508772818,-0.1843839222\H,-1.2124238074,-2  
.1419264975,0.1824101978\H,1.2098758458,-2.1283024576,0.2744901476\N,2  
.8135593689,0.0253806014,0.1569649756\N,-2.8259480468,-0.002805615,-0.  
0668596802\C,-3.6360327571,1.2053812544,0.0228633506\H,-3.2793943226,1  
.8680335519,0.8235409711\H,-3.6027015748,1.7865149529,-0.9139934887\C,  
-3.6223032494,-1.2207891966,-0.0563994958\H,-3.2764772641,-1.928270511  
3,-0.8215288723\H,-3.5660851397,-1.7427550378,0.9153206401\C,3.6099150  
717,1.2433632796,0.1465187234\H,3.5537093297,1.7653323907,-0.825200258  
1\H,3.2640805852,1.9508428294,0.9116461232\C,3.6236435151,-1.182807204  
5,0.0672592432\H,3.5902998468,-1.763936248,1.0041186028\H,3.267014902,  
-1.8454632161,-0.733419795\C,5.033649371,0.7416730675,0.425444463\C,5.  
0406218161,-0.6557132586,-0.2140289766\C,-5.0530068186,0.6782847552,0.  
3041669969\H,-5.8315571789,1.333955034,-0.0955522223\H,-5.2102914856,0  
.594267951,1.3854733003\C,-5.0460402384,-0.7190995971,-0.3353093687\H,  
-5.2064757559,-0.6402590269,-1.4164375359\H,-5.8129727633,-1.384721039  
4,0.070389823\H,5.8005860779,1.4072925596,0.0197500136\H,5.8191661226,  
-1.3113831525,0.1857026237\H,5.1940745236,0.6628349571,1.5065740488\H,  
5.1979198517,-0.5716995352,-1.2953332685\Version=EM64L-G09RevB.01\Sta  
te=1-A\HF=-655.0581211\RMSD=4.447e-09\RMSF=2.172e-06\Dipole=-0.0000018  
,0.0000002,0.00001\Quadrupole=9.0041279,-1.7063418,-7.2977861,0.064791  
3,-0.0229075,-0.0891286\PG=C01 [X(C14H20N2)]\@



## DHDiPrPD

```
1\1\GINC-SLEJPNER\FOpt\RB3LYP\6-31G(d,p)\C12H20N2\HAMMERICH\25-Mar-201
9\0\#\# opt=tight freq=noraman rb3lyp/6-31g(d,p)\DHDiPrPD_syn_syn_02_B
3LYP_6-31G_dp\0,1\C,-0.716840871,1.1093878652,-0.37834406\C,0.6697951
088,1.1087038115,-0.431492867\C,1.4087322537,-0.0868116524,-0.35807581
62\C,0.6805947882,-1.2797769169,-0.2378012076\C,-0.7151350026,-1.27908
91037,-0.1843063313\C,-1.4491675793,-0.0854024748,-0.2485371733\H,-1.2
493572302,2.0566222967,-0.434085895\H,1.1974146451,2.0554155095,-0.527
8698764\H,1.1966819455,-2.232014665,-0.1803226898\H,-1.2262456022,-2.2
308206042,-0.0874589002\N,2.8123109446,-0.0341155852,-0.3446120558\N,-
2.8475443706,-0.0313225917,-0.1276809794\H,3.1649746908,0.8475278363,-
0.6991863665\H,-3.2254497315,0.8506714034,-0.4542745584\C,-3.707661948
7,-1.1613145385,-0.4828531031\C,3.6416001421,-1.1649275425,-0.76458627
4\C,3.4771863525,-1.5285853786,-2.250594542\H,4.0596257142,-2.42089782
81,-2.5052831757\H,2.4290705542,-1.7235035497,-2.4936981891\H,3.824906
823,-0.7061358801,-2.8870450809\C,5.0999352636,-0.8506819404,-0.419020
0303\H,5.2071531661,-0.6279301156,0.6459726576\H,5.7495584593,-1.69455
4136,-0.669652868\H,5.4558365341,0.0183213458,-0.9872363153\C,-5.13495
23401,-0.8456347834,-0.026676559\H,-5.8026854889,-1.6888652445,-0.2267
819558\H,-5.1601035711,-0.6227837984,1.043383377\H,-5.5324559051,0.023
721973,-0.5660390238\C,-3.6578546675,-1.52512848,-1.9770615834\H,-4.05
24737739,-0.7023348959,-2.585081686\H,-2.6316187268,-1.7210762997,-2.2
996813034\H,-4.2589583926,-2.4168666224,-2.1863482865\H,-3.3593244464,
-2.0242730075,0.0980752876\H,3.3379102827,-2.0275851561,-0.158691729\
Version=EM64L-G09RevB.01\State=1-A\HF=-578.8629868\RMSD=9.493e-09\RMSF
=2.533e-06\Dipole=-0.0209786,0.0106626,-0.5470584\Quadrupole=5.8519368
,1.4180917,-7.2700285,-0.0634294,-0.5045468,-1.598069\PG=C01 [X(C12H20
N2)]\@
```

## DMeAzeta

```
1\1\GINC-SLEJPNER\FOpt\RB3LYP\6-31G(d,p)\C11H16N2\CECILIE\25-Apr-2014\
0\#\# freq=noraman opt=tight rb3lyp/6-31g(d,p)\DMeAzeta\0,1\C,-1.1994
297798,0.6214328928,0.7589422\C,0.1693678121,0.871827884,0.7962766399\
C,1.0905114713,-0.1501523863,1.0726849732\C,0.578319479,-1.4338781106,
1.3157045361\C,-0.7902183301,-1.6857377805,1.2787000581\C,-1.721504766
8,-0.6687859587,0.9844382508\H,-1.8621524544,1.4514421643,0.5467487635
\H,0.5236557737,1.8831765606,0.619734523\H,1.2565496875,-2.2489447329,
1.5506160298\H,-1.1266799379,-2.6952175211,1.4809054694\N,-3.098993641
9,-0.93240643,0.8987575826\C,-3.59345336,-2.1788109277,1.4566741362\H,
-3.1536709196,-3.0383808114,0.9399384166\H,-4.6739229705,-2.2316420103
,1.3084298334\C,-4.0144555354,0.1948369096,0.9219403473\H,-5.038479925
4,-0.1762373636,0.8453896566\H,-3.9362641918,0.8063264398,1.837034369\
H,-3.3869448915,-2.2907847999,2.5347495068\H,-3.8438363182,0.852833299
7,0.0633283179\N,2.4606608016,0.1090295644,1.1444418527\C,3.144607116,
1.1673663443,0.3841305323\H,3.2196780666,2.1317085906,0.9004929963\H,2
.7082401502,1.3358555573,-0.6130366358\C,3.5078929873,-0.8808718194,0.
8455562488\H,3.856565167,-1.4591177206,1.7094319334\H,3.2257567977,-1.
5819494877,0.044284523\C,4.4136740307,0.2779061104,0.3564434531\H,4.88
82544366,0.142853427,-0.6166891671\H,5.1667783691,0.5764141444,1.08857
29587\Version=EM64L-G09RevB.01\State=1-A\HF=-538.2848978\RMSD=4.707e
-09\RMSF=5.793e-07\Dipole=-0.0181761,-0.0390037,-0.1588246\Quadrupole=
```

7.1349872,-0.5138279,-6.6211592,0.7973011,-2.2678898,-1.8396037\PG=CS  
[SG(C3H2N2),X(C8H14)]\ \@

## DMeAzirA

1\1\GINC-SLEJPNER\FOpt\RB3LYP\6-31G(d,p)\C10H14N2\CECILIE\25-Apr-2014\  
0\#\# freq=noraman opt=tight rb3lyp/6-31g(d,p)\DMeAzirA\0,1\C,-1.3031  
002589,1.1812923815,-0.2568571923\C,0.0637638585,1.2385266672,-0.00054  
86408\C,0.7594386693,0.1236838638,0.4800886833\C,0.0339985032,-1.05080  
00983,0.7085158833\C,-1.332967533,-1.1160250037,0.4546812514\C,-2.0406  
57208,-0.0041234408,-0.0501004943\H,-1.7927498154,2.0748563941,-0.6237  
23331\H,0.5986363799,2.1693839455,-0.1665542684\H,0.5454037155,-1.9249  
395431,1.1015635092\H,-1.8463631784,-2.0486198509,0.6534172268\N,-3.40  
62139537,-0.0791822685,-0.3497470625\N,2.1347083865,0.2106921435,0.818  
7409472\C,-4.1660047281,-1.2093184302,0.1554398012\H,-3.7801652413,-2.  
1512561902,-0.2490077266\H,-5.2029243838,-1.1169919489,-0.1729667932\C  
, -4.1352409055,1.1563049757,-0.5773281222\H,-5.1764323993,0.9191613985  
, -0.8037374125\H,-4.1174773596,1.8404068312,0.2873729187\C,3.078429218  
8,-0.7541697777,0.2669443337\H,3.83056364,-1.1302104744,0.956398403\H,  
2.6977811581,-1.4861803727,-0.4446756315\C,3.0969682598,0.6721420019,-  
0.1748236234\H,3.8628549493,1.3540509481,0.1869456888\H,2.7285622119,0  
.8826497853,-1.1783671743\H,-4.1580759094,-1.2851734513,1.2555308098\H  
, -3.7301030967,1.6953255145,-1.4404709733\Version=EM64L-G09RevB.01\St  
ate=1-A\HF=-498.9588874\RMSD=3.350e-09\RMSF=6.370e-07\Dipole=-0.429120  
3,-0.1273249,-0.429106\Quadrupole=6.3063764,0.1741484,-6.4805248,-0.54  
85312,-1.5426308,-2.2552625\PG=C01 [X(C10H14N2)]\ \@

## DMeDEtPD

1\1\GINC-SLEJPNER\FOpt\RB3LYP\6-31G(d,p)\C12H20N2\CECILIE\28-Dec-2013\  
0\#\# opt=tight freq=noraman rb3lyp/6-31g(d,p)\DMeDEtPD\0,1\C,0.70273  
83615,-1.1995879791,-0.1045335062\C,-0.6879928115,-1.1963339829,-0.044  
4670513\C,-1.4336641544,0.0001519898,-0.05101962\C,-0.6839355566,1.192  
4139527,-0.1113037518\C,0.7073303425,1.1876444367,-0.1624394735\C,1.44  
92985647,-0.0084402528,-0.1763115955\H,1.2027986276,-2.1603994979,-0.0  
85014805\H,-1.1890307165,-2.1542048119,0.0291114544\H,-1.1831802685,2.  
1539361285,-0.1265674105\H,1.2105929529,2.146226583,-0.2021195049\N,2.  
8532049973,-0.0137720748,-0.2796899481\N,-2.8298988478,0.0036305283,0.  
0075844794\C,3.5568897451,1.2252328325,0.0021862744\H,3.2647805249,2.0  
073547676,-0.7060752953\H,4.6295239181,1.0621974656,-0.1222332285\C,3.  
5532616073,-1.2374132376,0.0701246205\H,4.6259864919,-1.0858660422,-0.  
0673875708\H,3.3804653628,-1.5621702291,1.110783425\C,-3.581395135,1.2  
403781374,0.1617170386\H,-4.5138570149,1.0026667301,0.6874474449\H,-3.  
0331889816,1.9179737887,0.8260008163\C,-3.5979495793,-1.2283443239,-0.  
0950014762\H,-4.5641679734,-0.9847497458,-0.5528745636\H,-3.1019747144  
, -1.907861935,-0.7972043145\C,-3.8376946635,-1.9366551932,1.2464656818  
\H,-4.3853699859,-1.2874147122,1.9375295849\H,-2.8921879833,-2.2082998  
968,1.7241579782\C,-3.9112579392,1.9485118169,-1.1606007757\H,-4.51091  
78868,1.302028587,-1.8098452978\H,-3.0003492389,2.2132861922,-1.704756  
7967\H,-4.4818159573,2.865998914,-0.977026585\H,-4.4259260219,-2.85006  
51199,1.1026509079\H,3.3814357812,1.6097970992,1.0217912932\H,3.255879  
7528,-2.0579019889,-0.5909857145\Version=EM64L-G09RevB.01\State=1-A\H

F=-578.8360222\RMSD=4.625e-09\RMSF=1.336e-06\Dipole=-0.1156041,0.0051128,0.1688624\Quadrupole=6.7604015,0.2526759,-7.0130774,0.0199859,0.7647992,0.1447009\PG=C01 [X(C12H20N2)]\@

## DMeDiPrPD

1\1\GINC-SLEJPNER\FOpt\RB3LYP\6-31G(d,p)\C14H24N2\HAMMERICH\25-Mar-2019\0\#\# opt=tight freq=noraman rb3lyp/6-31g(d,p)\DMeDiPrPD\_syn\_anti\_02\_B3LYP\_6-31G\_dp\0,1\C,-0.6767388847,1.2137093816,-0.1715079651\C,0.7126778241,1.174174082,-0.2425413577\C,1.4150118974,-0.0454973624,-0.2756272491\C,0.6392489064,-1.2174777686,-0.2299432625\C,-0.7516303503,-1.1777737071,-0.1988653658\C,-1.4541272152,0.0419162884,-0.170229319\H,-1.1633616605,2.1814206841,-0.0991714946\H,1.2505166118,2.1150925313,-0.2577181387\H,1.1295598321,-2.1856141166,-0.2015402104\H,-1.2894292659,-2.1186967663,-0.1826099791\N,2.8288622819,-0.1141125986,-0.2855275202\N,-2.8648955334,0.1101755114,-0.0761520616\C,-3.5696554028,1.0108070038,-1.0159436329\C,3.4627430119,-1.0065639841,-1.2818996696\C,-4.8046566033,1.6482394307,-0.3661735601\H,-4.5387895305,2.1192803447,0.5841934833\H,-5.2266235691,2.4116414193,-1.0280799959\H,-5.5958295957,0.9156762149,-0.1744631751\C,-3.9115627161,0.3343577835,-2.3561753452\H,-3.0170919603,-0.1085969217,-2.8054490742\H,-4.6596405694,-0.4556812219,-2.2315061146\H,-4.3201056025,1.0655450744,-3.0617610293\C,3.7059316011,-0.3187301752,-2.6377940464\H,2.7811343265,0.1277117355,-3.0167049069\H,4.4613590884,0.4704681179,-2.5615050429\H,4.0615657111,-1.0438121017,-3.3775060911\C,4.7417621969,-1.6490590498,-0.7295781073\H,4.5459645731,-2.1281748469,0.2336839475\H,5.1139639582,-2.406723647,-1.4269796741\H,5.5450574008,-0.9178876072,-0.5900734812\H,-2.8689251479,1.8197859064,-1.2339575018\H,2.7477043754,-1.8138992077,-1.4549014456\C,-3.5583862032,-1.1244269817,0.2517209311\H,-3.5328781328,-1.8890680464,-0.5432393904\H,-3.1187987092,-1.5623531485,1.1524462765\H,-4.6067294569,-0.9077095352,0.4690922573\C,3.5448492185,1.1178952619,0.0011656\H,3.4615242695,1.8892056295,-0.7833253327\H,3.1724265598,1.5480736221,0.9352805137\H,4.6062123851,0.8996764214,0.1394736916\Version=EM64L-G09RevB.01\State=1-A\HF=-657.4679984\RMSD=7.137e-09\RMSF=1.100e-07\Dipole=-0.0139831,0.0016135,-0.3817549\Quadrupole=4.8677653,0.6412661,-5.5090314,0.6529409,-0.3776138,0.0021245\PG=C01 [X(C14H24N2)]\@

## DMeMePiprzA

1\1\GINC-SLEJPNER\FOpt\RB3LYP\6-31G(d,p)\C13H21N3\HAMMERICH\23-Mar-2019\0\#\# opt=tight freq=noraman rb3lyp/6-31g(d,p)\DMeMePiprzPD Meout syn\0,1\C,-2.1681719302,1.0751301857,-0.2506044491\C,-0.7780762732,1.1039675561,-0.1858332066\C,-0.0290911752,-0.070617886,-0.0000780898\C,-0.7473543215,-1.2715656816,0.1060296273\C,-2.1351132208,-1.306537374,0.0070472435\C,-2.8876485937,-0.1297482137,-0.1675543573\N,-4.3022731963,-0.1290341924,-0.2046134712\N,1.3851409118,-0.0791666926,0.1225922571\C,2.114250729,-0.9330494245,-0.8229210981\C,2.0537906596,1.206218741,0.289092182\C,3.5551452776,-1.1307533268,-0.3601483649\C,3.4978464567,0.9934835899,0.7430631183\H,-2.6990327157,2.0154420018,-0.3564047239\H,-0.2797036291,2.0623702487,-0.277619722\H,-0.2120880381,-2.1998081796,0.2818226138\H,-2.6297147249,-2.2678839931,0.0781614228\H,1.6202973716,-1.9041540673,-0.8918667431\H,2.1187988277,-0.4867036826,-1.83356413

68\H,2.0579493918,1.7968645602,-0.6456507588\H,1.5234068798,1.78470434  
75,1.0512983831\H,4.0963255854,-1.7230242462,-1.1073688741\H,3.5545781  
055,-1.7049369096,0.5878332696\H,3.9989380585,1.9661416651,0.811812679  
7\H,3.4925773087,0.547107011,1.7572545478\C,-4.9427900646,0.6464718822  
, -1.2621220236\H,-6.0019443864,0.780023514,-1.0203468803\H,-4.49662055  
29,1.6372782345,-1.346206145\H,-4.8748806264,0.1583302072,-2.250349866  
2\C,-4.9772768731,-1.3894529465,0.0471089369\H,-6.0492743418,-1.199451  
1811,0.1534583712\H,-4.8461609543,-2.1348091054,-0.7585432931\H,-4.620  
4818644,-1.8294303194,0.9820751292\C,5.6241232812,0.0091621906,0.15271  
199\H,6.1427211142,-0.5805051317,-0.6103556817\H,6.100968021,0.9936210  
302,0.2017217917\H,5.773599109,-0.4906609059,1.1294809673\N,4.22405723  
35,0.1590159445,-0.2102663762\\Version=EM64L-G09RevB.01\State=1-A\HF=-  
672.2836215\RMSD=9.985e-09\RMSF=2.541e-06\Dipole=-0.069993,-0.1154133,  
-0.1773755\Quadrupole=5.8488165,0.6835957,-6.5324122,0.5054786,3.09989  
65,0.4267585\PG=C01 [X(C13H21N3)]\@

## DMeMorphA

1\1\GINC-SLEJPNER\FOpt\RB3LYP\6-31G(d,p)\C12H18N2O1\CECILIE\28-Dec-201  
3\0\#\# opt=tight freq=noraman rb3lyp/6-31g(d,p)\DMeMorphPD\0,1\C,0.1  
031979507,-0.6907951306,-1.1057818823\C,0.0745260042,0.7040807494,-1.0  
917664951\C,0.0250498029,1.4286501166,0.1142901318\C,0.0502437157,0.67  
2630759,1.3079051954\C,0.1016534377,-0.7145297153,1.2846540542\C,0.117  
6160612,-1.4366334208,0.0799374064\N,0.1926862412,-2.8573375575,0.1132  
2463\N,-0.0570123831,2.8257176365,0.1334172184\C,0.2141012733,3.520062  
9466,1.3804943328\C,0.2157435992,3.5508402999,-1.0951863794\C,0.513977  
8242,-3.5394306609,-1.1364425705\C,-0.9031666327,-3.5419479814,0.81252  
97744\C,0.8412199882,-5.0040684562,-0.8482987547\C,-0.5352338991,-5.00  
50980678,1.0405577108\H,0.1160371596,-1.1903962568,-2.0681282897\H,0.0  
794492404,1.2216193257,-2.0430854338\H,0.0495131441,1.1676185411,2.271  
211722\H,0.1576657247,-1.2507009967,2.2274272848\H,-0.5000600511,3.222  
9819915,2.1557070043\H,1.230217047,3.3408830871,1.7695429062\H,1.23210  
09341,3.3788901696,-1.4870658313\H,-0.4977371135,3.2732229638,-1.87829  
77373\H,-0.3192644381,-3.4969684547,-1.8627989967\H,1.3844013331,-3.05  
81060879,-1.5942168477\H,-1.0847422031,-3.0576299544,1.7750855769\H,-1  
.8406768272,-3.4897024453,0.2292717999\H,1.0091285273,-5.5485335453,-1  
.7822321163\H,1.7566687539,-5.0587631366,-0.2370284848\H,-1.3753348457  
, -5.547668805,1.4840724136\H,0.3262078001,-5.0631481006,1.7259144991\O  
, -0.2313120087,-5.6590908103,-0.1847347883\H,0.0927883805,4.5935562067  
,1.2239647059\H,0.0958466587,4.6203085106,-0.912407609\\Version=EM64L-  
G09RevB.01\State=1-A\HF=-652.834271\RMSD=8.831e-09\RMSF=1.417e-06\Dipo  
le=0.1695301,0.9309156,0.0730317\Quadrupole=-4.0874984,0.9309919,3.156  
5065,-0.21056,-1.9920305,-0.8080653\PG=C01 [X(C12H18N2O1)]\@

## DMePiprZA

1\1\GINC-SLEJPNER\FOpt\RB3LYP\6-31G(d,p)\C12H19N3\HAMMERICH\28-Mar-201  
9\0\#\# opt=tight freq=noraman rb3lyp/6-31g(d,p)\DMePiprZA syn NHup\0  
,1\C,1.7463734024,-1.0660136167,-0.2767014978\C,0.3570052264,-1.095936  
4212,-0.1977265016\C,-0.3889554155,0.0735779968,0.0262685231\C,0.33070  
01806,1.2710263376,0.156486395\C,1.7173600452,1.3084098033,0.044235384  
8\C,2.4674867225,0.136208822,-0.1689737057\N,3.8811059438,0.1368884299

, -0.2193135037\N, -1.8032068515, 0.0811461648, 0.1613092255\C, -2.5366714634, 0.9480257108, -0.7712046787\C, -2.4676689721, -1.2066661099, 0.3357255122\C, -3.9793372135, 1.1471474817, -0.2918493434\C, -3.9141667571, -0.9932792948, 0.8065512452\H, 2.2752444051, -2.003495832, -0.4127211654\H, -0.1430967562, -2.051626755, -0.3076004303\H, -0.203092382, 2.1939929421, 0.3622704097\H, 2.2131518119, 2.2673150243, 0.1361242533\H, -2.029680914, 1.9130815578, -0.8443454897\H, -2.546061964, 0.5080610091, -1.7886010879\H, -2.4764709553, -1.7984385046, -0.602530546\H, -1.9194117113, -1.7884257364, 1.0838165898\H, -4.535430835, 1.7449984442, -1.0224287462\H, -3.964785345, 1.7063243984, 0.6523280871\H, -4.4245832053, -1.9597589596, 0.8821891446\H, -3.8943371996, -0.5501050016, 1.8100015782\C, 4.5138552591, -0.6197673971, -1.2948492291\H, 5.5752654225, -0.7548442265, -1.0643603174\H, 4.0694784808, -1.6102493716, -1.3912677218\H, 4.4364163894, -0.115701271, -2.2742858561\C, 4.5591846188, 1.391410346, 0.0531681241\H, 5.6320765314, 1.1988539925, 0.1441134403\H, 4.4198054768, 2.1543579473, -0.734310735\H, 4.2125432186, 1.8105924972, 1.0013979704\N, -4.6974811487, -0.1082186395, -0.0584585228\H, -4.849481316, -0.5718458783, -0.9536951549\Version=EM64L-G09RevB.01\State=1-A\HF=-632.9706593\RMSD=7.383e-09\RMSF=3.225e-06\Dipole=0.4780402, -0.0670748, -0.5734837\Quadrupole=-0.322314, 3.246554, -2.92424, 2.3446273, 1.2757468, 0.695253\PG=C01 [X(C12H19N3)]\@

## TetPD

1\1\GINC-SLEJPNER\FOpt\RB3LYP\6-31G(d,p)\C14H24N2\HAMMERICH\23-Mar-2019\0\#\# opt=tight freq=norman rb3lyp/6-31g(d,p)\TetPD conf 02\0,1\C, 0.6877633448, -1.1694278623, -0.1431640855\C, -0.7045061243, -1.1538827236, -0.1330068193\C, -1.4390061793, 0.040121414, 0.010859608\C, -0.6760110288, 1.2174046638, 0.1438012007\C, 0.7162598683, 1.2018598557, 0.1336441179\C, 1.4507597113, 0.0078562939, -0.0102222731\H, 1.1767150795, -2.1265454864, -0.2819013509\H, -1.2166768181, -2.0998226603, -0.2644400745\H, -1.1649617482, 2.1745227867, 0.2825391605\H, 1.2284292175, 2.1478005739, 0.2650774544\N, 2.8497318405, -0.0077649275, -0.0204288969\N, -2.8379775786, 0.0557404039, 0.0210649397\C, 3.6234689895, 1.2234759897, -0.0604039459\H, 3.0978453414, 1.9626092556, -0.6753808662\H, 4.5620256458, 1.0143208535, -0.5880531331\C, 3.5962875605, -1.2559800787, 0.0084530378\H, 4.5468735529, -1.0679216342, 0.5223292934\H, 3.0633154956, -1.9832975912, 0.6311443623\C, -3.5845344408, 1.3039550358, -0.0078171513\H, -3.0515658077, 2.0312714453, -0.630512773\H, -4.5351222409, 1.1158939516, -0.5216889099\C, -3.6117148152, -1.1754995618, 0.0610511064\H, -3.0860869787, -1.9146318941, 0.6760253287\H, -4.5502667251, -0.9663429002, 0.5887082602\C, 3.8802863693, -1.8545085628, -1.3774468507\H, 2.9510159718, -2.0748550617, -1.9103034234\H, 4.458207631, -1.1560121134, -1.9915203403\C, 3.9409405501, 1.8152966551, 1.3211064302\H, 3.0246921947, 2.0562514641, 1.8674228592\H, 4.5120177296, 1.1039744677, 1.9268028925\C, -3.9291961546, -1.7673256343, -1.3204549343\H, -3.0129502243, -2.0082834345, -1.8667741143\H, -4.5002757904, -1.0560060696, -1.9261520194\C, -3.8685281336, 1.9024873989, 1.3780821242\H, -2.9392558576, 2.1228356079, 1.9109346203\H, -4.4464471322, 1.2039928944, 1.9921599718\H, 4.4555641716, -2.7831768022, -1.2891920801\H, 4.5354602193, 2.730903435, 1.2243144496\H, -4.4438063553, 2.8311552772, 1.2898267966\H, -4.5237159312, -2.6829315749, -1.2236557224\Version=EM64L-G09RevB.01\State=1-A\HF=-657.4713613\RMSD=6.665e-09\RMSF=1.972e-06\Dipole=-0.0000005, -0.0000009, 0.0000038\Quadrupole=6.8068844, 0.0449863, -6.8518708, -0.0752034, -0.0991908, 0.0445186\PG=C01 [X(C14H24N2)]\@

## TiPrPD

```
1\1\GINC-SLEJPNER\FOpt\RB3LYP\6-31G(d,p)\C18H32N2\HAMMERICH\01-Apr-201
9\0\#\# opt=tight freq=noraman b3lyp/6-31g(d,p)\TiPrPD conf09\0,1\C,-
0.771641144,-0.7254669572,-0.5333338509\C,0.6145745895,-0.8595472101,-
0.5592445716\C,1.4521431001,-0.079604452,0.2672144012\C,0.8013873777,0
.843373512,1.113067518\C,-0.5847526569,0.965205166,1.1388366658\C,-1.4
168397541,0.1815345145,0.3212762162\H,-1.3668478646,-1.3080665924,-1.2
27709417\H,1.041894012,-1.5547178935,-1.272164832\H,1.3815221604,1.450
3039068,1.7957760855\H,-1.0255759639,1.6762077173,1.8302713639\N,-2.83
60873646,0.304840205,0.3104890459\N,2.8508265822,-0.2223587681,0.27056
14257\C,-3.6506706986,-0.7710235305,0.9149855764\H,-4.6594151742,-0.35
35345693,1.0036107301\C,-3.4062291285,1.6647983088,0.2951705469\H,-2.5
879437618,2.31098392,-0.0397383964\C,3.4428197669,-1.4614729919,-0.263
0509847\H,2.6567028997,-2.217417759,-0.1875970944\C,3.756132875,0.9413
587762,0.4004334917\H,4.696137972,0.6125931808,-0.0536506348\C,-3.8938
402462,2.2061609079,1.6552897331\H,-4.226531845,3.24471001,1.550301576
9\H,-4.7433168984,1.631463709,2.0398405155\H,-3.1040839081,2.181515812
1,2.4112395175\C,-4.5239277385,1.7707129619,-0.7573510112\H,-4.8816872
939,2.8030889289,-0.8414567914\H,-4.1574220516,1.4469349812,-1.7350593
274\H,-5.3857221213,1.1470422303,-0.4944128186\C,-3.7744443366,-2.0107
966243,0.0131490028\H,-2.8274446204,-2.5545405929,-0.053095897\H,-4.52
26423587,-2.7014638396,0.418694098\H,-4.0791779623,-1.7248692278,-0.99
77218261\C,-3.1893357131,-1.1731878997,2.3273651131\H,-2.1799537372,-1
.5954355964,2.300919759\H,-3.1761351933,-0.3141075866,3.0040068955\H,-
3.8600184429,-1.9292354899,2.7503933474\C,4.1036599896,1.3080289063,1.
856874505\H,4.9399538526,2.0163368159,1.873998232\H,3.2683859005,1.777
9283905,2.3827258476\H,4.3971485148,0.4191002294,2.4209551564\C,3.3085
868176,2.1675168572,-0.4120355514\H,4.0831139387,2.9404486188,-0.36939
51264\H,3.1494220166,1.8992649643,-1.4604990555\H,2.3805463056,2.60164
24628,-0.0334056815\C,4.6014603878,-1.9699139097,0.6114100134\H,4.9371
589246,-2.9474101303,0.2494036937\H,5.4684971883,-1.3015749495,0.58823
37162\H,4.2812030381,-2.0805605004,1.651092266\C,3.8642441534,-1.36117
49653,-1.7420597817\H,4.2088746851,-2.3332648523,-2.1115206231\H,3.031
8557161,-1.0322161954,-2.3704192471\H,4.6874649536,-0.65085213,-1.8772
95396\Version=EM64L-G09RevB.01\State=1-A\HF=-814.7247805\RMSD=1.817e-
09\RMSF=1.390e-06\Dipole=0.455467,0.0373835,0.0061512\Quadrupole=4.542
0067,-0.7455611,-3.7964456,-0.9984367,-1.9065881,2.093062\PG=C01 [X(C1
8H32N2)]\@
```

## TMePD

```
1\1\GINC-SLEJPNER\FOpt\RB3LYP\6-31G(d,p)\C10H16N2\CECILIE\23-Dec-2013\
0\#\# opt=tight freq=noraman rb3lyp/6-31g(d,p)\TMePD pyram\0,1\C,0.69
4872,1.195366,-0.039273\C,-0.694873,1.195366,0.039273\C,-1.437192,-0.0
00002,0.091525\C,-0.694872,-1.195369,0.039276\C,0.694872,-1.195369,-0.
039271\C,1.437192,0.0000000828,-0.091524\H,1.197127,2.154744,-0.066648
\H,-1.197128,2.154744,0.066646\H,-1.197128,-2.154747,0.066654\H,1.1971
27,-2.154747,-0.066646\N,-2.836722,-0.000003,0.218047\C,-3.547339,1.23
3944,-0.068594\C,-3.54734,-1.23394,-0.068643\N,2.836721,-0.000003,-0.2
18046\C,3.54734,1.233944,0.068594\C,3.547341,-1.233939,0.068638\H,3.24
```

3573,2.027416,-0.622137\H,4.617123,1.071258,-0.077812\H,3.391223,1.602707,1.096789\H,3.391209,-1.602674,1.09684\H,4.617125,-1.071253,-0.077755\H,3.24359,-2.027433,-0.622075\H,-4.617123,1.071258,0.077805\H,-3.243577,2.027415,0.62214\H,-3.391217,1.602709,-1.096787\H,-4.617126,-1.071252,0.077736\H,-3.391194,-1.602677,-1.096842\H,-3.243599,-2.027432,0.622077\Version=EM64L-G09RevB.01\State=1-A\HF=-500.2005164\RMSD=6.195e-09\RMSF=4.655e-07\Dipole=0.0000042,0.0000014,-0.0000035\Quadrupole=7.1209858,0.2343721,-7.3553579,0.0000015,1.2845224,0.0000005\PG=C01 [X(C10H16N2)]\@

## TrMeEtPD

1\1\GINC-SLEJPNER\FOpt\RB3LYP\6-31G(d,p)\C11H18N2\HAMMERICH\27-Mar-2019\0\#\# opt=tight freq=noraman rb3lyp/6-31g(d,p)\TrMeEtPD syn 01\0,1\C,1.1842097012,1.2368559076,-0.1261180778\C,-0.2008301804,1.3833342049,-0.0765434802\C,-1.0634098553,0.2727208285,-0.0556057313\C,-0.4506586637,-0.9950080234,-0.0930565561\C,0.9304935687,-1.1419821561,-0.1571528667\C,1.79673828,-0.0296141416,-0.1606274585\H,1.7850831821,2.1379493796,-0.1488318882\H,-0.6039418297,2.3894035435,-0.0741217912\H,-1.0579607433,-1.8933400285,-0.055400092\H,1.3298379782,-2.1484237792,-0.1892855609\N,3.1944565904,-0.1799449154,-0.171151522\N,-2.4569485939,0.4096427898,0.0256169788\C,3.7385378832,-1.469826824,-0.5589954017\H,3.4210576273,-2.2523654055,0.1379249052\H,4.8286771935,-1.4237315586,-0.5164142424\C,4.0012353587,0.9819465259,-0.5000365127\H,5.0572534468,0.7086693642,-0.4495897142\H,3.7973784024,1.3899980726,-1.5049803095\C,-3.3343128899,-0.5906597799,-0.5813823485\H,-4.0582496768,-0.0787410529,-1.2314403057\H,-2.742180123,-1.2316339878,-1.2415378956\C,-3.0282042877,1.7304490639,0.1919199886\H,-4.0900783554,1.6328880989,0.4324700434\H,-2.550757992,2.2553785913,1.02515691\C,-4.0859899206,-1.444603951,0.4454187511\H,-4.696421749,-0.818464298,1.1044483939\H,-3.3871511278,-2.0041903271,1.0742724324\H,-4.7509799306,-2.1582606433,-0.0542369152\H,3.4450943395,-1.7829785545,-1.5755856013\H,3.8396046145,1.7846263757,0.2268915504\H,-2.9414972874,2.3667671601,-0.7067691221\Version=EM64L-G09RevB.01\State=1-A\HF=-539.5179502\RMSD=2.741e-09\RMSF=7.513e-07\Dipole=-0.007105,0.0241616,-0.28435\Quadrupole=6.3937752,0.2638612,-6.6576364,-0.9688639,-0.8915795,0.7057826\PG=C01 [X(C11H18N2)]\@

## TrMeiPrPD

1\1\GINC-SLEJPNER\FOpt\RB3LYP\6-31G(d,p)\C12H20N2\HAMMERICH\27-Mar-2019\0\#\# opt=tight freq=noraman rb3lyp/6-31g(d,p)\TrMeiPrPD anti 02\0,1\C,0.066486,1.297571,-0.065699\C,1.448916,1.197454,0.096557\C,2.108705,-0.044494,0.058545\C,1.30478,-1.176454,-0.201621\C,-0.066973,-1.066164,-0.384485\C,-0.734026,0.170584,-0.304943\H,-0.381305,2.283063,-0.00437\H,2.006357,2.11061,0.2651\H,1.752154,-2.159268,-0.285932\H,-0.630668,-1.962369,-0.625579\N,-2.133948,0.244001,-0.52667\N,3.489041,-0.158416,0.27827\C,4.152765,-1.386892,-0.123612\H,5.212248,-1.318612,0.131209\H,3.744743,-2.246042,0.418719\H,4.070212,-1.597624,-1.203145\C,-2.675519,1.565366,-0.798777\H,-2.662298,2.255111,0.062569\H,-2.106106,2.030665,-1.608407\H,-3.711639,1.474728,-1.133505\C,-2.986993,-0.637039,0.304166\H,-2.392119,-1.535355,0.486677\C,-4.245866,-1.077929,-0.453554\H,-4.784362,-1.838675,0.121164\H,-4.941215,-0.248206,-0.619323\H,-3.9

80485,-1.49991,-1.42693\C,-3.328019,-0.031553,1.677924\H,-2.41776,0.278367,2.200752\H,-3.983719,0.840598,1.584009\H,-3.845918,-0.766356,2.303436\C,4.291405,1.051793,0.247549\H,4.253931,1.578616,-0.72101\H,3.96661,1.752721,1.023558\H,5.331726,0.795378,0.457509\\Version=EM64L-G09RevB.01\State=1-A\HF=-578.8345344\RMSD=5.009e-09\RMSF=3.210e-06\Dipole=0.2686206,0.0184572,0.0770764\Quadrupole=6.434453,0.300452,-6.734905,-0.5554895,-0.6942577,-0.0170351\PG=C01 [X(C12H20N2)]\@

b) Radical cations in the gas phase – lowest free energy conformers  
UB3LYP/6-31G(d,p)

**BMorphB<sup>•+</sup>**

1\1\GINC-SLEJPNER\FOpt\UB3LYP\6-31G(d,p)\C14H20N2O2(1+,2)\HAMMERICH\28-Mar-2019\0\#\ opt=tight freq=noraman ub3lyp/6-31g(d,p)\BMorphB\_RC syn anti\\1,2\C,-0.7032322169,1.2012997132,0.0344068514\C,0.6524574664,1.2058767736,0.2380991806\C,1.4312175442,0.0076222796,0.1951063835\C,0.7117177583,-1.1932365506,-0.0935822088\C,-0.6456721012,-1.199443545,-0.2855739641\C,-1.4274427456,-0.0040761738,-0.2218565922\H,-1.2149392357,2.1524272753,0.0836249568\H,1.1253797028,2.1629018762,0.4101725806\H,1.2259189081,-2.1419720845,-0.159974607\H,-1.1102298306,-2.1484465732,-0.5152289259\N,-2.777140493,-0.0149022378,-0.4050193898\N,2.7768826443,0.0145816298,0.4060248657\C,3.66476753,-1.1374119394,0.170178625\H,3.0980878927,-2.0231353607,-0.1044583763\H,4.3226416984,-0.8813625925,-0.6695946333\C,3.5371256425,1.1942492819,0.8534722931\H,4.1774191352,1.5303110916,0.0289919212\H,2.8689081185,2.005765344,1.1307411706\C,-3.5855970507,-1.2408062709,-0.5205686873\H,-3.9565356351,-1.3187217909,-1.5496534722\H,-2.990362838,-2.1222751561,-0.295488734\C,-3.6079395435,1.1918125088,-0.5620743156\H,-3.0220127735,2.0959902206,-0.4199126807\H,-3.9945932531,1.1957332423,-1.5887501213\C,-4.7737804998,-1.1744235881,0.453219371\H,-5.4233073729,-2.0376005027,0.2901400853\H,-4.4010674879,-1.2032402293,1.4890532916\C,-4.7893547836,1.1576857685,0.4169557662\H,-5.4497236289,2.0059026526,0.2224805375\H,-4.4195695271,1.2268224913,1.4519251861\C,4.5234500635,-1.412635855,1.4120827333\H,5.2443286516,-2.2028527134,1.190112758\H,3.8822826982,-1.7418888895,2.2446566868\C,4.4076725758,0.8234112041,2.065527819\H,5.042814712,1.6727861862,2.3276561564\H,3.7596436768,0.58834908,2.9243071758\O,-5.5544276303,-0.0173618146,0.2319791177\O,5.2634321581,-0.2616531218,1.769793135\\Version=EM64L-G09RevB.01\State=2-A\HF=-805.2504157\S2=0.759945\S2-1=0.\S2A=0.750031\RMSD=6.539e-09\RMSF=8.827e-07\Dipole=0.0530216,0.0507995,-0.3646839\Quadrupole=14.5682717,0.1129913,-14.681263,-0.5205572,4.3107846,2.1133314\PG=C01 [X(C14H20N2O2)]\@

**BPipB<sup>•+</sup>**

1\1\GINC-SLEJPNER\FOpt\UB3LYP\6-31G(d,p)\C16H24N2(1+,2)\HAMMERICH\28-Mar-2019\0\#\ opt=tight freq=noraman ub3lyp/6-31g(d,p)\BPipB\_RC anti anti\\1,2\C,-0.6201416994,-1.210511645,0.2665527089\C,0.7246346121,-1.180930656,0.0039380604\C,1.4169077007,0.0374114113,-0.2829565662\C,0.61



83297017,1.2240720042,-0.2703460952\C,-0.7239547419,1.1962212548,0.006  
8794858\C,-1.4174658274,-0.023168219,0.2864866881\H,-1.063227112,-2.17  
29243876,0.4817489331\H,1.2509847964,-2.1252900024,0.0003427625\H,1.06  
66747671,2.1892909589,-0.4614228798\H,-1.2555565434,2.1375771446,-0.01  
36178401\N,-2.7491703671,-0.0502521365,0.5636730805\N,2.7485847265,0.0  
651052548,-0.5602142748\C,3.6698315702,-1.0621816221,-0.3231248457\H,3  
.1205156965,-1.9497163829,-0.0214857128\H,4.1684119742,-1.2879495066,-  
1.2739849507\C,3.4709653797,1.2665400197,-1.0173495096\H,3.9932000684,  
0.9841153908,-1.9407563245\H,2.7703858632,2.0543644523,-1.2818371773\C  
, -3.5766564324,1.1553190082,0.7537191147\H,-4.0814308423,1.0379000241,  
1.721494309\H,-2.9490756789,2.0392516909,0.8327034337\C,-3.5676176508,  
-1.2771360353,0.5878070738\H,-2.9410596296,-2.1584851118,0.4824440182\  
H,-4.0539673634,-1.331447221,1.5697454008\C,-4.6221359331,1.287987265,  
-0.3638323376\H,-5.2336868555,2.1745967131,-0.1672321928\H,-4.10762399  
04,1.4545757728,-1.3181569219\C,-4.6244283278,-1.234268309,-0.53047015  
84\H,-5.2382728691,-2.1379911351,-0.4571263129\H,-4.1115461751,-1.2710  
628795,-1.4992601149\C,-5.4935337524,0.0267604815,-0.4376246582\H,-6.1  
242906993,-0.0301653412,0.4592597685\H,-6.1715424446,0.0819940839,-1.2  
945575528\C,4.708291216,-0.6848217659,0.7485236033\H,5.3983472111,-1.5  
263950271,0.8688419619\H,4.1912489269,-0.5527645103,1.7067427816\C,4.4  
904115179,1.730049492,0.0340490229\H,5.0251970963,2.601438934,-0.35762  
33486\H,3.9543702812,2.0564828996,0.9336658811\C,5.4664301396,0.595369  
6947,0.3736990168\H,6.1289443805,0.8949456662,1.1912622697\H,6.1082881  
297,0.3981035971,-0.4949786601\\Version=EM64L-G09RevB.01\State=2-A\HF=  
-733.4885756\s2=0.760436\s2-1=0.\s2A=0.750033\RMSD=2.880e-09\RMSF=8.20  
7e-07\Dipole=0.0029838,-0.0682571,0.0075731\Quadrupole=31.9893617,-10.  
6099021,-21.3794596,1.4241599,-3.8935453,-1.3751207\PG=C01 [X(C16H24N2  
)]\@

## BPyrB<sup>+</sup>

1\1\GINC-SLEJPNER\Fopt\UB3LYP\6-31G(d,p)\C14H20N2(1+,2)\CECILIE\17-Dec  
-2013\0\#\# freq=normal opt=tight ub3lyp/6-31g(d,p)\BPyrB\_RC (unrestr  
icted open shell)\1,2\C,0.6851678289,-1.2220462395,0.0004700644\C,-0.  
6851693998,-1.2220452573,-0.0004696708\C,-1.4278425972,0.0000020308,-0.  
0000002935\C,-0.6851676612,1.2220479238,0.0004694977\C,0.685169862,1.  
2220469851,-0.0004692202\C,1.4278429687,-0.0000001377,0.0000010647\H,1  
.2074674222,-2.1704272047,-0.0062325911\H,-1.2074705673,-2.1704253627,  
0.0062314854\H,-1.2074662235,2.1704294236,-0.0062336763\H,1.2074702252  
,2.1704275087,0.0062317976\N,2.777980733,-0.0000010661,-0.0000006271\N  
, -2.777980503,0.0000017836,-0.0000016077\C,-3.6110809145,-1.2200376524  
, -0.0733316505\H,-3.2466545718,-1.8825882169,-0.8629523981\H,-3.554681  
2357,-1.7574273188,0.8820889182\C,-3.6110845846,1.2200390743,0.0733256  
185\H,-3.2466527084,1.8825993225,0.8629351786\H,-3.5546984898,1.757418  
516,-0.8821016778\C,3.6110831629,1.2200376587,-0.0733248977\H,3.246655  
027,1.8825949813,-0.862938886\H,3.5546884025,1.757419734,0.8821003502\  
C,3.6110829122,-1.2200394701,0.0733289153\H,3.2466530885,-1.8825949543  
,0.8629437242\H,3.5546904778,-1.7574243758,-0.8820948486\C,5.023286318  
9,0.6869007703,-0.3437436116\H,5.1813982078,0.5767022792,-1.4213605611  
\H,5.7920166456,1.359827451,0.0407140187\C,5.0232859071,-0.6869024353,  
0.3437494896\H,5.7920166376,-1.3598288183,-0.0407079257\H,5.1813968587  
, -0.5767043423,1.4213665699\C,-5.0232869473,-0.686902191,-0.3437411511

\H,-5.792013812,-1.3598309287,0.0407198148\H,-5.1814053458,-0.57670214  
12,-1.4213569559\C,-5.0232850239,0.6868996318,0.3437543489\H,-5.181387  
751,0.5766991294,1.4213724633\H,-5.7920193498,1.3598259213,-0.04069606  
91\\Version=EM64L-G09RevB.01\State=2-A\HF=-654.8601016\S2=0.759819\S2-  
1=0.\S2A=0.75003\RMSD=8.357e-09\RMSF=1.705e-07\Dipole=0.0000054,0.0000  
019,-0.0000034\Quadrupole=32.4080217,-10.5835299,-21.8244918,-0.000004  
4,0.0000121,0.0000037\PG=C01 [X(C14H20N2)]\@

## DHDiPrPD<sup>+</sup>

1\1\GINC-SLEJPNER\FOpt\UB3LYP\6-31G(d,p)\C12H20N2(1+,2)\HAMMERICH\26-M  
ar-2019\0\\# opt=tight freq=noraman ub3lyp/6-31g(d,p)\DHDiPrPD\_RC\_ant  
i\_syn\_02\_B3LYP\_6-31G\_dp\\1,2\C,-0.6660059406,1.144127187,-0.1533602572  
\C,0.6620565548,1.1443032295,0.164823848\C,1.3807358652,-0.0824225706,  
0.3323884102\C,0.6673106016,-1.3068229656,0.1588801437\C,-0.6671635771  
, -1.306996465,-0.1618042143\C,-1.3826337522,-0.0827929497,-0.328129339  
3\H,-1.1923335275,2.0863979292,-0.2750457782\H,1.1868096114,2.08672191  
71,0.2920413486\H,1.1780985742,-2.2534694415,0.2828233771\H,-1.1763708  
598,-2.253750912,-0.2912996811\N,2.6936318812,-0.0391719215,0.63397698  
32\N,-2.6955994612,-0.039968293,-0.62947043\H,3.0950510362,0.881781165  
5,0.7711421263\H,-3.0985598478,0.8811007969,-0.7612256313\C,-3.6074091  
717,-1.1726529758,-0.8847919407\C,-3.5015249033,-1.6382474931,-2.34458  
10712\H,-4.1524410596,-2.5020885816,-2.5050088473\H,-3.8153827063,-0.8  
44462185,-3.0294444303\H,-2.4787937097,-1.9278809522,-2.6014126808\C,-  
5.0279771368,-0.7478753398,-0.5055724667\H,-5.715313335,-1.5832601906,  
-0.6571010054\H,-5.0883217872,-0.442000738,0.5422803545\H,-5.373549962  
,0.0799570961,-1.1356428668\C,3.6073418815,-1.1718072109,0.8826372043\  
C,5.0271855385,-0.7424407346,0.5058799671\H,5.3713944936,0.0822629174,  
1.1407816373\H,5.7159222908,-1.5775488693,0.6524959074\H,5.0869839304,  
-0.4303313409,-0.5401642858\C,3.5022823611,-1.6461214141,2.3396762067\  
H,3.8148353148,-0.8558381626,3.0291712837\H,2.4800443945,-1.9389628622  
,2.5948285274\H,4.1546463486,-2.5097982845,2.4950267632\H,-3.298749818  
, -1.9842845448,-0.2181819373\H,3.3000169578,-1.9800339196,0.2112907651  
\\Version=EM64L-G09RevB.01\State=2-A\HF=-578.6551672\S2=0.758661\S2-1=  
0.\S2A=0.750024\RMSD=4.894e-09\RMSF=1.006e-06\Dipole=-0.0004138,0.4940  
121,0.0014529\Quadrupole=24.2616452,-7.6767777,-16.5848675,-0.0070447,  
11.4950243,0.0357817\PG=C01 [X(C12H20N2)]\@

## DMeAzeta<sup>+</sup>

1\1\GINC-SLEJPNER\FOpt\UB3LYP\6-31G(d,p)\C11H16N2(1+,2)\CECILIE\25-Apr  
-2014\0\\# freq=noraman opt=tight ub3lyp/6-31g(d,p)\DMeAzeta\_RC (Unre  
stricted open shell)\1,2\C,-1.1011321857,-1.1095010467,-0.2897605688\  
C,0.2558622562,-1.2943293102,-0.2472572996\C,1.1138585317,-0.286554598  
4,0.2859482767\C,0.5232227519,0.917479394,0.7733158953\C,-0.8340050069  
,1.1003774219,0.7299219588\C,-1.7030264057,0.0950804369,0.1968024724\H  
, -1.7184207605,-1.8969220679,-0.7014581399\H,0.6836028226,-2.217242250  
6,-0.6231405863\H,1.1567044348,1.6966130762,1.1827914036\H,-1.24410401  
52,2.0269868631,1.1091129297\N,-3.0472966885,0.2772079137,0.1542529496  
\C,-3.9280432768,-0.7600877176,-0.394362234\C,-3.6529244036,1.51588642  
14,0.6558163616\H,-3.8408318346,-1.6899014963,0.1765568365\H,-3.690711

7386,-0.9602790773,-1.4439836446\H,-4.9588921841,-0.4178072884,-0.3357487805\H,-3.4365484814,1.6546299472,1.719789974\H,-4.7319699335,1.4594501298,0.5304505448\H,-3.2864273084,2.3842214598,0.0992356986\N,2.4414747647,-0.466418401,0.3279562212\C,3.551378446,0.3761776603,0.8101328202\H,3.6415503049,1.3186430813,0.2597277283\H,3.4911912182,0.5878116461,1.8829359773\C,3.3151896851,-1.5777547307,-0.0914509512\H,3.2676168197,-1.7748180541,-1.1676575615\H,3.1172627794,-2.5056076856,0.4555699753\C,4.5369739632,-0.7503071831,0.3942463763\H,5.085083316,-1.1986608988,1.2223397855\H,5.2348195191,-0.4707424044,-0.3944478913\\Version=EM64L-G09RevB.01\State=2-A\HF=-538.079687\S2=0.759484\S2-1=0.\S2A=0.75003\RMSD=7.976e-09\RMSF=2.422e-07\Dipole=-0.2779728,0.0376621,-0.0088009\Quadrupole=26.5314332,-9.171166,-17.3602672,-5.0695193,1.9734326,4.1384152\PG=C01 [X(C11H16N2)]\@

### DMeAzirA\*

1\1\GINC-SLEJPNER\FOpt\UB3LYP\6-31G(d,p)\C10H14N2(1+,2)\CECILIE\25-Apr-2014\0\#\# freq=noraman opt=tight ub3lyp/6-31g(d,p)\DMeAzirA\_RC (Unrestricted open shell)\1,2\C,-0.8249150392,-1.2302321293,0.0672218592\C,0.539610689,-1.2328252837,0.1938968603\C,1.2618431179,-0.0105117131,0.2959646387\C,0.5391999322,1.2157466192,0.2831122665\C,-0.8253264393,1.2219218163,0.1565676835\C,-1.5628139646,-0.0017859702,0.0434748584\H,-1.3420560079,-2.1770836346,-0.0132558571\H,1.0828819473,-2.1713540152,0.2192235963\H,1.0821569435,2.1501255619,0.3766801454\H,-1.3427855294,2.1719460879,0.1452047198\N,2.6005035725,-0.01739181,0.4909721767\C,3.6876394805,-0.7508559741,-0.1146393682\C,3.6873854744,0.758563808,-0.0596473766\N,-2.912880946,0.0024434345,-0.078833089\C,-3.663604545,-1.2557158675,-0.1826414494\C,-3.6640285196,1.264568954,-0.0908179982\H,-3.5251763608,-1.8667164297,0.7146290432\H,-3.3454912965,-1.8268701939,-1.0599383526\H,-4.7223817489,-1.0294503664,-0.2854998123\H,-3.5258024857,1.8086964756,0.8485420898\H,-4.7227298943,1.0460331531,-0.2098917384\H,-3.346111081,1.8981614286,-0.9242158592\H,4.3298808628,-1.2997605701,0.568771873\H,3.4899867184,-1.2331400701,-1.069577902\H,3.4895576417,1.3089896872,-0.9769629847\H,4.3294524879,1.2565000016,0.6618999568\\Version=EM64L-G09RevB.01\State=2-A\HF=-498.737988\S2=0.759602\S2-1=0.\S2A=0.750031\RMSD=6.981e-09\RMSF=3.664e-07\Dipole=-0.3204351,0.0131887,-0.363466\Quadrupole=24.4312984,-6.3798855,-18.0514129,-0.0062194,0.3125756,0.4258699\PG=C01 [X(C10H14N2)]\@

### DMeDEtPD\*

1\1\GINC-SLEJPNER\FOpt\UB3LYP\6-31G(d,p)\C12H20N2(1+,2)\HAMMERICH\27-Mar-2019\0\#\# opt=tight freq=noraman ub3lyp/6-31g(d,p)\DMeDEtPD\_RC conf01\1,2\C,-1.2879144906,1.1831890129,-0.2730738825\C,0.0826396459,1.1840555886,-0.2834131055\C,0.837726929,0.0086500856,0.0286163691\C,0.0889542043,-1.168295639,0.3499201483\C,-1.2816220294,-1.1702359286,0.3564867046\C,-2.0321734279,0.0057114249,0.0463166269\H,-1.8030759261,2.1058157144,-0.5058084462\H,0.5894591023,2.110980239,-0.5152879028\H,0.6004925672,-2.0941772764,0.5755141809\H,-1.7919835312,-2.0939127604,0.5955455262\N,-3.388899918,0.0043221058,0.0546871598\N,2.194893018,0.0100403584,0.0202502604\C,-4.134691483,-1.2103906298,0.4015182935\H,-3.932

0367899,-2.0128564235,-0.3151840916\H,-5.2000458246,-0.9915694012,0.37  
9436635\C,-4.1414025064,1.2175012644,-0.2828917144\H,-5.2059522412,0.9  
964926579,-0.2476859109\H,-3.9315770489,2.0203809269,0.4312794446\C,2.  
9885510866,-1.1616752205,0.4395413321\H,3.9247887795,-0.7724476363,0.8  
478581253\H,2.4786649444,-1.6609448347,1.2657442116\C,2.9809217026,1.1  
833721757,-0.4087765348\H,3.9128422344,0.7960566526,-0.8286254517\H,2.  
4598611983,1.6815982535,-1.2286126854\C,3.280986972,2.1558760789,0.736  
2851819\H,3.8326457741,1.6633628206,1.5419588212\H,2.3642842148,2.5756  
262451,1.1592493625\C,3.2764529584,-2.1335883995,-0.7091388712\H,3.817  
1232792,-1.6399648588,-1.5215539641\H,2.3554633345,-2.5552209642,-1.12  
07657075\H,3.8970781457,-2.9561169603,-0.3431777651\H,3.8953676571,2.9  
796700776,0.3627130932\H,-3.874968781,-1.5544936199,1.4073113578\H,-3.  
89480575,1.5621378703,-1.291800801\\Version=EM64L-G09RevB.01\State=2-A  
\HF=-578.6327789\S2=0.759961\S2-1=0.\S2A=0.750032\RMSD=6.464e-09\RMSF=  
2.908e-06\Dipole=-0.7458388,-0.0007618,0.0046037\Quadrupole=25.8638164  
, -6.7743763, -19.08944, 0.0168145, -0.2745094, -2.6912364\PG=C01 [X(C12H20  
N2)]\@

## DMeDiPrPD<sup>+</sup>

1\1\GINC-SLEJPNER\FOpt\UB3LYP\6-31G(d,p)\C14H24N2(1+,2)\HAMMERICH\26-M  
ar-2019\0\# opt=tight freq=noraman ub3lyp/6-31g(d,p)\DMeDiPrPD\_RC\_an  
ti\_anti\_03\_B3LYP\_6-31G\_dp\1,2\C,-0.7615736202,1.1609392673,0.12516036  
3\C,0.6058348398,1.2548723772,0.1038571\C,1.4363645778,0.0966045069,-0  
.0201970944\C,0.7608189639,-1.1603392648,-0.1256022082\C,-0.6065891925  
, -1.2542726341, -0.1042976335\C, -1.4371197774, -0.0960041094, 0.019751551  
9\H, -1.3328310071, 2.0782275362, 0.1787411082\H, 1.0434766849, 2.243581800  
8, 0.1353127416\H, 1.3320771046, -2.0776273585, -0.1791794508\H, -1.0442297  
16, -2.2429827465, -0.135750008\N, 2.7936667866, 0.1646807466, -0.047099490  
5\N, -2.7944225794, -0.1640778035, 0.0466488334\C, -3.5489672185, -1.403194  
115, -0.2936871979\C, -4.0670205635, -2.0958222849, 0.9737354948\H, -4.5684  
993868, -3.0287529203, 0.7020550457\H, -3.2498386959, -2.3324809892, 1.6607  
471176\H, -4.7932147495, -1.4742735653, 1.5063304023\C, -4.660898597, -1.11  
39844936, -1.3124738039\H, -4.2716680661, -0.5888978943, -2.1890281085\H, -  
5.0808147581, -2.065759973, -1.6487370536\H, -5.4814681666, -0.5299586854,  
-0.8881048339\C, 3.5482035128, 1.4038022169, 0.2932358205\C, 4.0661683356,  
2.0964833929, -0.9741944771\H, 3.2489409368, 2.3331601063, -1.6611459232\H  
, 4.5676574953, 3.0294082156, -0.7025133325\H, 4.7923319956, 1.4749574969, -  
1.5068578445\C, 4.6602034348, 1.1145858948, 1.3119454376\H, 5.4807703584, 0  
.530610935, 0.8875019552\H, 5.0801031717, 2.0663619886, 1.6482272469\H, 4.2  
710438065, 0.5894457898, 2.1884991057\H, -2.8388247711, -2.0627043959, -0.7  
916639456\H, 2.8380734463, 2.0632770293, 0.7912786106\C, -3.5815506789, 1.0  
138363471, 0.4262829724\H, -3.6617457002, 1.7284760912, -0.4003870985\H, -4  
.5854065303, 0.6989783822, 0.7037343947\H, -3.1340781046, 1.5094363175, 1.2  
895540954\C, 3.5807966415, -1.0132232016, -0.4267605675\H, 4.5846361904, -0  
.698351141, -0.7042557938\H, 3.6610375244, -1.7278581689, 0.3999092478\H, 3  
.1332960221, -1.5088335938, -1.2900106592\\Version=EM64L-G09RevB.01\Stat  
e=2-A\HF=-657.266264\S2=0.760422\S2-1=0.\S2A=0.750033\RMSD=9.906e-09\R  
MSF=4.113e-06\Dipole=-0.0000022, -0.0000049, -0.0000014\Quadrupole=27.80  
86203, -7.7213173, -20.087303, 5.7512743, 0.0347956, 1.9648901\PG=C01 [X(C1  
4H24N2)]\@

## DMeMePiprzA\*

```
1\1\GINC-SLEJPNER\FOpt\UB3LYP\6-31G(d,p)\C13H21N3(1+,2)\CECILIE\05-Mar
-2014\0\#\# freq=noraman opt=tight ub3lyp/6-31g(d,p)\DMeMePiprzPD conf
2\1,2\C,2.189310199,-1.2188096453,-0.1404315606\C,0.8187285432,-1.232
5954667,-0.1699722765\C,0.0499811141,-0.0265409399,-0.1207330225\C,0.7
901367653,1.1953835923,-0.0362893189\C,2.160189299,1.2100143254,0.0021
701944\C,2.923046302,0.0034049239,-0.0510910398\N,4.279177587,0.018376
2854,-0.0218386799\N,-1.3100923286,-0.0427086301,-0.1603955112\C,-2.14
51614953,1.1393397432,-0.4337168635\C,-2.1242133639,-1.2579420744,0.01
13263238\C,-3.2108246265,1.3225667751,0.6509345224\C,-3.1972914553,-1.
0272763282,1.0861457778\H,2.7124458936,-2.163554986,-0.2092069708\H,0.
3273843644,-2.1896825451,-0.2798201171\H,0.2755127859,2.1435424419,0.0
389459581\H,2.6593636749,2.1660040494,0.0900996871\H,-1.5318065408,2.0
306460979,-0.5316876788\H,-2.6431511195,0.9648072983,-1.3953308742\H,-
2.6059308901,-1.4928135872,-0.9449961094\H,-1.4977200243,-2.0953905933
,0.3079887236\H,-3.8477961,2.1663508292,0.3671310058\H,-2.7181661226,1
.5836365097,1.6081226363\H,-3.825223191,-1.9227001597,1.1329297041\H,-
2.7000723491,-0.9183741106,2.0699415363\C,5.0128392151,1.2875774177,0.
0255375119\H,6.0804674836,1.0823647013,-0.0139091681\H,4.7527702143,1.
9209471244,-0.827983469\H,4.7994191021,1.8303616544,0.9523381204\C,5.0
428531235,-1.2335925668,-0.0486075105\H,6.1025053553,-1.0054430883,0.0
446387516\H,4.7567979145,-1.8829536231,0.7841642795\H,4.8860935899,-1.
7694090767,-0.9907887686\C,-5.1640719038,0.2780994503,1.645888337\H,-5
.7834791408,1.1119616246,1.3048225168\H,-5.7750127105,-0.6282626317,1.
6224693547\H,-4.8686183329,0.4704373089,2.6921005453\N,-4.0234324015,0
.1197449598,0.7465294325\Version=EM64L-G09RevB.01\State=2-A\HF=-672.0
763983\S2=0.760018\S2-1=0.\S2A=0.750032\RMSD=2.612e-09\RMSF=2.270e-06\
Dipole=1.926489,-0.0183356,-0.1387791\Quadrupole=31.7411684,-9.3805547
,-22.3606137,-0.6781327,-4.8032084,-0.1084575\PG=C01 [X(C13H21N3)]\@
```

## DMeMorphA\*

```
1\1\GINC-SLEJPNER\FOpt\UB3LYP\6-31G(d,p)\C12H18N2O1(1+,2)\CECILIE\29-D
ec-2013\0\#\# opt=tight freq=noraman ub3lyp/6-31g(d,p)\DMeMorphPD_RC\
1,2\C,-0.7391473448,1.1927270195,0.0295520128\C,0.6161126622,1.2134390
022,0.2350200329\C,1.4026870963,0.0188405526,0.2050400372\C,0.69752914
38,-1.200598342,-0.044055268\C,-0.6566038989,-1.2221641649,-0.25655802
86\C,-1.4373086859,-0.0260918111,-0.2301313991\H,-1.2806553117,2.12755
75225,0.0909711843\H,1.0744706503,2.1652824352,0.4663373778\H,1.228994
3444,-2.140562305,-0.1043727583\H,-1.1270618135,-2.1746758552,-0.46188
56113\N,-2.7775767701,-0.0475686824,-0.4364769273\N,2.748913549,0.0441
066096,0.4121320014\C,3.5573092854,1.2750265022,0.4331864526\H,2.96236
10445,2.1346094047,0.1332364249\H,3.9259547521,1.4358077125,1.45324641
04\C,3.5755711242,-1.1474509271,0.6699514021\H,3.9626419638,-1.0611210
5,1.6928303456\H,2.9835800114,-2.057089202,0.6121750054\C,-3.482800242
5,-1.3160704496,-0.6505364859\H,-3.151294228,-1.7986328207,-1.57596672
55\H,-3.3196355547,-1.999330181,0.1882429111\C,-3.5555881146,1.1962174
695,-0.4387697202\H,-3.1635494905,1.8993297361,-1.179425439\H,-4.58775
41412,0.9689332336,-0.6966434136\C,4.7486084697,1.1252253205,-0.529966
7854\H,5.4006236069,1.9967780759,-0.4361079871\H,4.3774272692,1.071088
```

0162,-1.5652455307\C,4.7587831079,-1.1979429614,-0.3061429773\H,5.4173  
136788,-2.0282782124,-0.0412813367\H,4.3919673392,-1.3500054781,-1.333  
1879474\O,5.5245444743,-0.0123092266,-0.2133726347\H,-4.5499781227,-1.  
1199974876,-0.7288467885\H,-3.5416181343,1.6701663341,0.5484606859\\Ve  
rsion=EM64L-G09RevB.01\State=2-A\HF=-652.6218002\S2=0.75987\S2-1=0.\S2  
A=0.750031\RMSD=6.434e-09\RMSF=2.364e-06\Dipole=-1.9542683,-0.0065538,  
-0.0389109\Quadrupole=21.9156168,-4.0724976,-17.8431192,0.1906289,4.74  
54288,0.7101443\PG=C01 [X(C12H18N2O1)]\@

## DMePiprzA\*

1\1\GINC-SLEJPNER\FOpt\UB3LYP\6-31G(d,p)\C12H19N3(1+,2)\CECILIE\05-Mar  
-2014\0\#\# opt=tight freq=noraman ub3lyp/6-31g(d,p)\DMePiprzPD\1,2  
\C,2.1237545398,-1.2185088434,-0.1361168353\C,0.7571544544,-1.24441082  
29,-0.2414092718\C,-0.0247046814,-0.0457129995,-0.2285843648\C,0.69880  
41067,1.1822973715,-0.0988357797\C,2.0645686055,1.2090172169,0.0150981  
588\C,2.8402505309,0.0096691627,-0.0008318008\N,4.1924576244,0.0363055  
891,0.103918938\N,-1.3807235412,-0.0740632829,-0.3432494927\C,-2.21012  
6929,1.108270351,-0.643324817\C,-2.1920572002,-1.2976201763,-0.1996557  
959\C,-3.3007273548,1.2913060591,0.4187416228\C,-3.2901430365,-1.07453  
49412,0.8535105883\H,2.6586521075,-2.158091345,-0.1813559551\H,0.28228  
60254,-2.2055637469,-0.3833920334\H,0.172330537,2.1255432278,-0.047235  
8331\H,2.5492583299,2.1688783895,0.1357958058\H,-1.592924871,1.9974338  
548,-0.7351124822\H,-2.6887422039,0.9255434157,-1.6128503953\H,-2.6527  
330161,-1.5248245443,-1.1677438349\H,-1.5669771348,-2.1335649556,0.103  
0587128\H,-3.9360861194,2.1310642183,0.1226436883\H,-2.8215320636,1.54  
96261015,1.3809735054\H,-3.9191677598,-1.9689578555,0.8851629143\H,-2.  
8061820741,-0.9651924998,1.8413952586\C,4.9121367698,1.3114259396,0.18  
99646912\H,5.9822577741,1.1154768263,0.1945597737\H,4.6832692375,1.947  
4587341,-0.6703373049\H,4.6550936177,1.8471445766,1.1099305911\C,4.967  
113246,-1.2090536797,0.1223343814\H,6.0160841404,-0.972409901,0.287565  
9688\H,4.6317683452,-1.8647892679,0.9312445376\H,4.8784191129,-1.74153  
59432,-0.8306323457\N,-4.0948818401,0.0730351817,0.46667711\H,-4.90310  
02492,0.1790923791,1.0713388657\\Version=EM64L-G09RevB.01\State=2-A\HF  
=-632.7639054\S2=0.760051\S2-1=0.\S2A=0.750032\RMSD=8.542e-09\RMSF=2.1  
31e-06\Dipole=1.2640413,0.0401254,0.2164692\Quadrupole=29.013402,-8.08  
42984,-20.9291037,-0.4286088,-2.4408161,-0.0446223\PG=C01 [X(C12H19N3)  
]\@

## TetPD\*

1\1\GINC-SLEJPNER\FOpt\UB3LYP\6-31G(d,p)\C14H24N2(1+,2)\HAMMERICH\17-M  
ay-2019\0\#\# opt=tight freq=noraman ub3lyp/6-31g(d,p)\TetPD\_RC conf03  
in MeCN\1,2\C,0.6853038475,-1.2160907525,0.0019843057\C,-0.685304254  
7,-1.2160905589,-0.0019841018\C,-1.4389900077,0.0000000597,0.000000296  
5\C,-0.6853041866,1.216090645,0.0019843844\C,0.6853039114,1.2160907669  
, -0.0019845491\C,1.4389898351,-0.0000000133,-0.0000002552\N,2.79657789  
56,-0.0000000039,-0.0000005297\N,-2.7965775553,0.0000000549,0.00000054  
06\C,3.5857672577,1.2420639462,-0.1075241232\C,3.5857673548,-1.2420639  
396,0.1075227571\C,-3.5857668828,1.2420636739,0.1075248843\C,-3.585766  
8637,-1.2420635779,-0.10752354\C,3.8798167011,-1.8865275032,-1.2506706

551\C,3.8798171462,1.88652749,1.2506691805\C,-3.8798170888,-1.88652762  
52,1.2506694904\C,-3.8798175417,1.8865277438,-1.2506680425\H,1.1928971  
064,-2.1712815277,-0.0071498844\H,-1.1928973172,-2.1712812394,0.007150  
3172\H,-1.1928971938,2.1712813528,-0.0071498752\H,1.1928972365,2.17128  
1511,0.0071494146\H,3.0702895525,1.9359726594,-0.7744193563\H,4.520139  
4958,0.9748027772,-0.6080204404\H,4.5201397958,-0.9748027162,0.6080186  
663\H,3.0702899805,-1.9359726642,0.7744182305\H,-4.5201388661,0.974802  
4661,0.6080213231\H,-3.0702892602,1.9359723072,0.774419981\H,-4.520139  
0036,-0.9748024248,-0.6080197145\H,-3.0702893874,-1.9359721988,-0.7744  
187652\H,2.9608591154,-2.1854805353,-1.7619707197\H,4.4247603081,-1.20  
06209647,-1.9053492507\H,2.9608597616,2.1854804515,1.7619696469\H,4.42  
47610779,1.2006209689,1.9053475242\H,-4.4247610031,-1.2006214009,1.905  
3479521\H,-2.9608599762,-2.1854808648,1.7619700211\H,-4.424761618,1.20  
06215119,-1.9053463609\H,-2.9608605924,2.1854810365,-1.7619688349\H,4.  
4980900109,-2.7768826418,-1.1065963337\H,4.4980903385,2.776882671,1.10  
65946168\H,-4.4980907908,2.7768827422,-1.1065929302\H,-4.4980903392,-2  
.7768826552,1.1065945817\\Version=EM64L-G09RevB.01\State=2-A\HF=-657.2  
724732\s2=0.76005\s2-1=0.\s2A=0.750031\RMSD=6.109e-09\RMSF=1.501e-07\D  
ipole=-0.0000027,0.,0.\Quadrupole=26.605475,-6.4336196,-20.1718554,-0.  
0000015,-0.0000088,0.000002\PG=C01 [X(C14H24N2)]\@

## TiPrPD<sup>+</sup>

1\1\GINC-SLEJPNER\Fopt\UB3LYP\6-31G(d,p)\C18H32N2(1+,2)\HAMMERICH\24-A  
pr-2019\0\#\# opt=tight freq=noraman ub3lyp/6-31g(d,p)\TiPrPD RC conf1  
2\1,2\C,0.6945310825,-1.2927791523,-0.1152028051\C,-0.673922512,-1.30  
41588576,-0.0318960792\C,-1.4559416697,-0.1084001622,-0.1318755898\C,-  
0.7091017173,1.0977619416,-0.3152579058\C,0.6593522668,1.1091419178,-0  
.3985629306\C,1.4413698906,-0.086618124,-0.2985959551\H,1.2115064721,-  
2.2298782786,0.0198102676\H,-1.1486454581,-2.25339341,0.1754492164\H,-  
1.2260744398,2.0348635243,-0.4502607203\H,1.134076759,2.0583784506,-0.  
605896588\N,2.8025719797,-0.075193968,-0.3693743195\N,-2.817143986,-0.  
119826874,-0.0611124482\C,3.6239026383,-1.2858435857,-0.691612898\H,4.  
6059991201,-0.8688168837,-0.9179410931\C,3.5569108092,1.2103468296,-0.  
2625245558\H,2.8612320019,1.9309660338,0.1653913322\C,-3.5714833562,-1  
.4053678115,-0.1679567706\H,-2.8757928768,-2.1260024881,-0.5958261481\  
C,-3.6384839305,1.0908279553,0.2610850301\H,-4.6205872705,0.6738045352  
,0.4873874394\C,4.0026324591,1.7148459093,-1.6423963634\H,4.4780362805  
,2.6942963184,-1.538586112\H,4.7327206219,1.0437620577,-2.1048011722\H  
,3.1532392558,1.8170684682,-2.3237625645\C,4.7199007537,1.117241398,0.  
7368032495\H,5.1403849488,2.1183254278,0.8667874227\H,4.3772879501,0.7  
686290332,1.7144129475\H,5.531398326,0.4693701033,0.3959071997\C,3.830  
0689431,-2.2350329917,0.5021014938\H,2.9380420303,-2.8091657268,0.7609  
46841\H,4.6144831642,-2.9530648999,0.2456899649\H,4.1513283619,-1.6896  
771696,1.3919962548\C,3.1665088637,-1.9960450225,-1.9748327649\H,2.219  
9778245,-2.5279727997,-1.8655038308\H,3.0662386865,-1.285405884,-2.799  
4744762\H,3.9263013207,-2.7313181739,-2.2543314035\C,-3.8446136505,2.0  
400013136,-0.9326482863\H,-4.6290321937,2.7580396138,-0.6762679479\H,-  
2.9525782658,2.6141265779,-1.1914795425\H,-4.1658517404,1.4946336382,-  
1.8225434126\C,-3.1811300172,1.8010430087,1.544311606\H,-3.9409300209,  
2.5363204609,1.8237784312\H,-3.0808875041,1.0904122085,2.3689637204\H,  
-2.2345944735,2.3329678856,1.4350084963\C,-4.7344335148,-1.3122847362,

-1.1673330647\H,-5.1549216448,-2.313369052,-1.297302121\H,-5.545939316  
9,-0.6643946791,-0.8264919776\H,-4.391777661,-0.9637064681,-2.14493982  
69\C,-4.0172561906,-1.9098315568,1.2119112416\H,-4.492655474,-2.889284  
8086,1.1081068269\H,-3.1678871224,-2.0120380303,1.8933098413\H,-4.7473  
618334,-1.2387383065,1.6742746409\\Version=EM64L-G09RevB.01\State=2-A\  
HF=-814.5261055\S2=0.760917\S2-1=0.\S2A=0.750036\RMSD=2.783e-09\RMSF=2  
.377e-06\Dipole=-0.0000059,-0.0000015,-0.0000022\Quadrupole=28.6476438  
, -7.8228243, -20.8248195, 0.5445857, -3.5386079, 0.1892555\PG=C01 [X(C18H3  
2N2)]\@

## TMepD<sup>+</sup>

1\1\GINC-SLEJPNER\FOpt\UB3LYP\6-31G(d,p)\C10H16N2(1+,2)\CECILIE\11-Dec  
-2013\0\#\ UB3LYP/6-31G(d,p) Freq=noraman Opt=Tight Guess=save\\TMepD\_  
RC (Unrestricted open shell)\1,2\C,0.685273,1.22,0.00001\C,-0.685273,  
1.22,-0.000023\C,-1.43104,-0.000001037,-0.000034\C,-0.685273,-1.22000  
1,-0.000009\C,0.685273,-1.220001,0.000022\C,1.431041,-0.000001105,0.0  
00034\H,1.199641,2.1719,0.000022\H,-1.199641,2.1719,-0.00003\H,-1.1996  
4,-2.171902,-0.000024\H,1.199642,-2.171901,0.000034\N,-2.78745,-0.0000  
000968,-0.000066\C,-3.53791,1.261202,-0.000144\C,-3.537912,-1.261201,-  
0.000008\N,2.787449,-0.0000001255,0.000065\C,3.537911,1.261201,0.00006  
2\C,3.537911,-1.261201,0.000091\H,3.307995,1.85254,0.89188\H,3.308039,  
1.85251,-0.891787\H,4.603,1.040488,0.000093\H,3.307985,-1.852526,0.891  
916\H,4.603001,-1.040487,0.000131\H,3.30805,-1.852524,-0.891752\H,-4.6  
02999,1.04049,-0.000294\H,-3.308134,1.852512,0.891731\H,-3.307896,1.85  
2538,-0.891937\H,-3.308076,-1.852534,-0.891852\H,-3.307961,-1.852516,0  
.891815\H,-4.603001,-1.040486,0.000061\\Version=EM64L-G09RevB.01\State  
=2-A\HF=-499.9929221\S2=0.75975\S2-1=0.\S2A=0.75003\RMSD=9.018e-09\RMS  
F=3.431e-07\Dipole=0.0000041,0.0000002,0.0000011\Quadrupole=24.4849187  
, -5.7570166, -18.7279021, 0.0000013, 0.000931, -0.000219\PG=C01 [X(C10H16N  
2)]\@

## TrMeEtPD<sup>+</sup>

1\1\GINC-SLEJPNER\FOpt\UB3LYP\6-31G(d,p)\C11H18N2(1+,2)\HAMMERICH\27-M  
ar-2019\0\#\ opt=tight freq=noraman ub3lyp/6-31g(d,p)\TrMeEtPD conf02  
\1,2\C,-1.130156168,1.2568490683,-0.3033148938\C,0.2198728306,1.40068  
04534,-0.1142042376\C,1.0705213185,0.2719711866,0.106557883\C,0.447572  
6302,-1.0162913519,0.1103982814\C,-0.9014325095,-1.1603779125,-0.08264  
89243\C,-1.751373297,-0.030345597,-0.2942664319\H,-1.7260275676,2.1478  
398886,-0.451213886\H,0.6338678512,2.4003268948,-0.1149995626\H,1.0421  
874043,-1.91010525,0.2438703921\H,-1.3156124107,-2.1599459746,-0.08313  
16277\N,-3.0875674211,-0.1735808969,-0.479544064\N,2.4040019174,0.4279  
780888,0.3023414437\C,-3.9398828757,0.9947301324,-0.7269006571\H,-3.92  
89580631,1.6765949486,0.1296400336\H,-4.9627668651,0.6607403911,-0.886  
4447852\C,-3.7122379003,-1.5005740505,-0.4396500288\H,-4.7887216857,-1  
.3898133911,-0.5502125906\H,-3.3440844915,-2.1325721035,-1.254561989\C  
,3.2984136239,-0.6963958892,0.63965657\H,4.0750607962,-0.2920128502,1.  
2941050447\H,2.7434291085,-1.4217012716,1.236516205\C,3.0380058401,1.7  
432166954,0.1584548116\H,4.1191554195,1.6130482092,0.1629906635\H,2.75  
40701005,2.2139029922,-0.7857667476\C,3.9265720725,-1.3526166112,-0.59



33519004\H,4.5096548795,-0.6325428116,-1.1742940462\H,3.1648384913,-1.7832070406,-1.2491890689\H,4.6003422435,-2.1535279221,-0.2767491683\H,-3.6115571033,1.5354976685,-1.6197140578\H,-3.5140228681,-1.9957921566,0.5155166535\H,2.7648137591,2.4043368732,0.9882950756\\Version=EM64L-G09RevB.01\State=2-A\HF=-539.313031\S2=0.759879\S2-1=0.\S2A=0.750031\RMSD=5.615e-09\RMSF=1.964e-06\Dipole=-0.4354316,0.1436441,0.0123089\Quadrupole=24.5462782,-6.0230317,-18.5232465,2.2895079,5.286146,-0.6246437\PG=C01 [X(C11H18N2)]\@

## TrMeiPrPD\*

1\1\GINC-SLEJPNER\FOpt\UB3LYP\6-31G(d,p)\C12H20N2(1+,2)\HAMMERICH\27-Mar-2019\0\#\# opt=tight freq=noraman ub3lyp/6-31g(d,p)\TrMeiPrPD RC anti 02\1,2\C,0.1627032811,1.4210334304,-0.0899620084\C,1.5255741327,1.2808826482,-0.1357005371\C,2.1448961834,-0.0054856175,-0.0828789327\C,1.2773881662,-1.1371022367,0.0130625839\C,-0.084907752,-0.9961210914,0.0648812777\C,-0.7098198039,0.2914813835,0.0222064445\H,-0.2469616269,2.4220182295,-0.1087394277\H,2.1317880524,2.1750877463,-0.1974030947\H,1.6889747724,-2.1377090245,0.0272304887\H,-0.6826519006,-1.8965870728,0.1007543247\N,-2.0580868312,0.4568069338,0.0727799994\N,3.4934902099,-0.1463243348,-0.1247474749\C,4.1123776082,-1.4724781289,-0.0239209225\H,5.1939241264,-1.3584073369,0.0035179088\H,3.7974993819,-1.9802083018,0.8924079997\H,3.851888698,-2.0952708136,-0.8863528718\C,-2.6467842858,1.7725049914,-0.2016384217\H,-2.5151738482,2.4548305242,0.6451070296\H,-2.1984832694,2.213360157,-1.0940547682\H,-3.7124442703,1.6551769364,-0.3837273218\C,-3.0028051086,-0.6465865078,0.4070147598\H,-2.3937243611,-1.4626851201,0.7932848355\C,-3.7423787682,-1.1333035433,-0.8461825292\H,-4.3793603376,-1.9831230799,-0.5860254327\H,-4.3870813685,-0.3554666816,-1.2663533322\H,-3.0417447287,-1.4545149609,-1.6218133482\C,-3.9519914929,-0.2365308817,1.5426771281\H,-3.3981387058,0.1331735947,2.409917384\H,-4.6745607852,0.5246491639,1.2368166649\H,-4.5208144548,-1.1161617495,1.855659794\C,4.3650027516,1.0244635298,-0.2724480576\H,4.1159611971,1.5836933098,-1.1791213767\H,4.2799527158,1.6891482546,0.5936177328\H,5.3976334224,0.6910236503,-0.3497154979\\Version=EM64L-G09RevB.01\State=2-A\HF=-578.6296858\S2=0.760145\S2-1=0.\S2A=0.750032\RMSD=3.422e-09\RMSF=1.093e-06\Dipole=0.8833857,0.1215465,-0.0506659\Quadrupole=26.8223973,-7.2548985,-19.5674989,-1.7825625,-2.2547932,-1.1223232\PG=C01 [X(C12H20N2)]\@
